# Supplementary material for: Exploration of novel triazolo-thiadiazine hybrids of deferasirox as multi-target-directed anti-neuroinflammatory agents with structure–activity relationship (SAR): a new treatment opportunity for Alzheimer's disease
Source: Royal Society of Chemistry journal article supplement (doi:10.1039/d4ra06916a), 2025-01-01
Supplement: d4ra06916a1.pdf [file d4ra06916a1.pdf]

## **Exploration of Novel Triazolo-thiadiazine Hybrids of Deferasirox as Multi-Target Directed Anti-Neuroinflammatory Agents with Structure-Activity Relationship (SAR): A New Treatment Opportunity for Alzheimer's Disease**

Syed Ahmad Shakir<sup>1</sup>, Umer Rashid<sup>\*1</sup>, Marryum<sup>1</sup>, Nighat Fatima<sup>2</sup>, Syeda Abida Ejaz<sup>3</sup>, Ammara Fayyaz<sup>3</sup>, Muhammad Zahid Ullah<sup>1</sup>, Aamer Saeed<sup>4</sup>, Ajmal Khan<sup>5,6</sup>, Ahmed Al Harrasi<sup>5</sup>, Amara Mumtaz<sup>1\*</sup>

<sup>1</sup>Department of Chemistry, COMSATS University Islamabad, Abbottabad Campus, 22060, Pakistan

<sup>2</sup>Department of Pharmacy, COMSATS University Islamabad, Abbottabad Campus, 22060, Pakistan

<sup>3</sup>Department of Pharmaceutical Chemistry, Faculty of Pharmacy, The Islamia University of Bahawalpur, Bahawalpur 63100, Pakistan

<sup>4</sup>Department of Chemistry, Quaid-i-Azam University Islamabad, 45320, Pakistan.

<sup>5</sup>Natural and Medical Sciences Research Center, University of Nizwa, 616, Nizwa, Oman

<sup>6</sup>Department of Chemical and Biological Engineering, College of Engineering, Korea University, 145 Anan-RO, Seongbuk-Gu, Seoul, 02841, Korea.

**Table S1.** Physical characteristics of compounds (10-13)

| Compounds | M.P (°C) | Color       | Yield | R <sub>f</sub> value<br><i>n</i> -hexane:ethylacetate |
|-----------|----------|-------------|-------|-------------------------------------------------------|
| 10        | oil      | Dark yellow | 65    | 0.3                                                   |
| 11        | 167-168  | White       | 86    | 0.5                                                   |
| 12        | 199-201  | Light brown | 78    | 0.4                                                   |
| 13        | 245-256  | Off-white   | 88    | 0.5                                                   |

**Table S2.** Physical characteristics of compounds

| Compounds | M.P (°C)                    |
|-----------|-----------------------------|
| 14a       | Obs.: 91-93, Lit.:93-95     |
| 14b       | Obs.: 92-94, Lit.: 94-96    |
| 14c       | Obs.: 90-92, Lit.: 92-94    |
| 14d       | Obs.: 51-52, Lit.:51-52     |
| 14e       | Obs.: 67-69, Lit.:70-71     |
| 14f       | Obs.: 40-42, Lit.: 44-46    |
| 14g       | Obs.: 50-52, Lit.:50-52     |
| 14h       | Obs.: 172-174               |
| 14i       | Obs.: 123-125               |
| 14j       | Obs.: 127-128, Lit.:123-126 |
| 14k       | Obs.: 22-24, Lit.:24        |

**Table S3.** Physical characteristics of compounds (15-25)

| Compounds | M.P. (°C) | Yield | R <sub>f</sub> values* |
|-----------|-----------|-------|------------------------|
| 15        | 141-143   | 81    | 0.5 <sup>a</sup>       |
| 16        | 166-167   | 85    | 0.4 <sup>b</sup>       |
| 17        | 177-176   | 68    | 0.5 <sup>b</sup>       |

|           |         |    |                  |
|-----------|---------|----|------------------|
| <b>18</b> | 171-172 | 73 | 0.6 <sup>b</sup> |
| <b>19</b> | 182-184 | 67 | 0.5 <sup>c</sup> |
| <b>20</b> | 178-179 | 63 | 0.5 <sup>a</sup> |
| <b>21</b> | 171-172 | 77 | 0.5 <sup>a</sup> |
| <b>22</b> | 177-179 | 88 | 0.4 <sup>a</sup> |
| <b>23</b> | 199-201 | 65 | 0.4 <sup>a</sup> |
| <b>24</b> | 156-158 | 88 | 0.5 <sup>a</sup> |
| <b>25</b> | 199-202 | 78 | 0.5 <sup>a</sup> |

\**n*-hexane:Ethylacetate, a: 2:, b: 3:2, c: 4:1

**Table S4: Data of ligand interaction with different targeted enzymes AChE and BChE**

| Sr #      | Binding energy kJ/mol | Hydrogen bond interactions                                     | Hydrophobic interactions       | Binding energy kJ/mol | Hydrogen bond interactions                                                             | Hydrophobic interactions                               |
|-----------|-----------------------|----------------------------------------------------------------|--------------------------------|-----------------------|----------------------------------------------------------------------------------------|--------------------------------------------------------|
|           | <b>AChE</b>           |                                                                |                                | <b>BChE</b>           |                                                                                        |                                                        |
| <b>09</b> | -7.1015               | Gly118, Gly119, Phe331 (Conventional hydrogen bond)            | Tyr334, Phe330, Trp279 (pi-pi) | -7.8481               | His438, Gly117, Gly115, Tyr128 (Conventional hydrogen bond)                            | Trp231, Phe329, Gly116, Trp82 (pi-pi)                  |
| <b>10</b> | -7.1871               | Tyr121, Asp72, (Conventional hydrogen bond)                    | Tyr70, Phe330 (pi-pi)          | -7.9663               | Glu197, Gly117 (Conventional hydrogen bond)                                            | Gly116, Trp231, Phe329, Trp82, Gly115(pi-pi)           |
| <b>11</b> | -7.7815               | Glu199, Phe331 (Conventional hydrogen bond), Trp84 (pi-sulfur) | Tyr334, Phe330, His440 (pi-pi) | -7.2876               | Trp82, Glu197, Gly117, Gly116,(Conventional hydrogen bond), Trp430, Tyr332 (pi-sulfur) | Phe329, His438, Gly115(pi-pi)<br>Trp231,(pi-lone pair) |
| <b>13</b> | -7.5908               | Glu199, Tyr130, Ser81 (Conventional hydrogen bond),            | Trp84, Tyr121, Phe330 (pi-pi)  | -7.2007               | Trp82,Trp430,Gly117,Ser287 (Conventional hydrogen bond), Trp440 (pi-sulfur)            | Gly115, Tyr332, Trp231, (pi-pi)                        |
| <b>15</b> |                       |                                                                |                                | -8.7031               | Gln119, Gly117, Pro285 (Conventional hydrogen bond)<br>Trp82 (pi-sulfur)               | Trp430, Gly116 (pi-pi)                                 |
| <b>16</b> |                       |                                                                |                                |                       | Thr284, Gly116, Gly117, Glu197(Conventional                                            | Tyr332 (pi-pi)                                         |

|    |  |  |  |         |                                                                                              |                                     |
|----|--|--|--|---------|----------------------------------------------------------------------------------------------|-------------------------------------|
|    |  |  |  | -8.4920 | hydrogen bond), Trp85 (pi-sulfur)                                                            |                                     |
| 17 |  |  |  | -7.6317 | Lle69, Asn83, Gly115, Tyr128, Trp82, Trp430 (Conventional hydrogen bond), Tyr440 (pi-sulfur) | Asp70, (pi-anion)<br>Tyr332 (pi-pi) |
| 18 |  |  |  | -8.8203 | Gly116, Gly117, Glu197 (Conventional hydrogen bond), Trp82 (pi-sulfur)                       | Tyr332, Trp430 (pi-pi)              |
| 19 |  |  |  | -8.7788 | Leu286, Asp70, Asn83 (Conventional hydrogen bond)                                            | Phe329, Trp231, Trp82 (pi-pi)       |
| 20 |  |  |  | -8.8328 | Glu197, Gly117, Gly116 (Conventional hydrogen bond), Trp82, His438 (pi-sulfur)               | Tyr332, (pi-pi) Ala328 (pi-sigma)   |
| 21 |  |  |  | -8.8256 | Leu286, Asp70, Asn83 (Conventional hydrogen bond), Phe398 (pi-sulfur)                        | ----                                |
| 22 |  |  |  | -9.1950 | Asn83, Gly116, Gly117 (Conventional hydrogen bond), Tyr82 (pi-sulfur)                        | Lle69, Tyr332, (pi-pi)              |
| 23 |  |  |  | -9.6624 | Gly117, Ser79 (Conventional hydrogen bond), Trp430 (pi-sulfur)                               | Phe329, (pi-pi)                     |
| 24 |  |  |  | -8.2383 | Thr120, Tyr332, Trp82, Gly78 (Conventional hydrogen bond), Tyr440 (pi-sulfur)                | His438 (pi-pi)                      |
| 25 |  |  |  | -8.9153 |                                                                                              | Asp70 (pi-anion)                    |

**Table S5: Data of ligand interaction with different targeted enzymes MAO-A and MAO-B**

| Codes | Binding energy kJ/mol | Hydrogen bond interactions                                            | Hydrophobic interactions               | Binding energy KJ/mol | Hydrogen bond interactions                                              | Hydrophobic interactions      |
|-------|-----------------------|-----------------------------------------------------------------------|----------------------------------------|-----------------------|-------------------------------------------------------------------------|-------------------------------|
|       |                       | <b>MAO-A</b>                                                          |                                        |                       | <b>MAO-B</b>                                                            |                               |
| 09    | -8.7685               | Tyr69, Met45 (Conventional hydrogen bond)                             | Tyr407, Tyr444, Gly66, Trp397, (pi-pi) | -7.9061               | Tyr60, Trp388, (Conventional hydrogen bond), Met438, Cys397 (pi-sulfur) | Tyr435, Gly57, Tyr398 (pi-pi) |
| 10    | -9.2840               | Ala68, Tyr444, Ala68 (Conventional hydrogen bond), Cys406 (pi-sulfur) | Tyr407 (pi-pi)                         | -8.2758               | Tyr60, (Conventional hydrogen bond), Cys172 (pi-sulfur)                 | Tyr398, Tyr435 (pi-pi)        |

|    |          |                                                                                                               |                                                         |         |                                                                                                          |                                                                |
|----|----------|---------------------------------------------------------------------------------------------------------------|---------------------------------------------------------|---------|----------------------------------------------------------------------------------------------------------|----------------------------------------------------------------|
| 12 | -9.4415  | Arg51,Thr435,<br>(Conventional hydrogen bond),<br>Met445(pi-sulfur)                                           | Gly66,Trp397,<br>Tyr407,Tyr444<br>(pi-pi)               | -8.6640 | Ser59,<br>(Conventional hydrogen bond),Cys172,<br>Phe168,(pi-sulfur)                                     | Tyr435, Tyr60,<br>Gly57, Trp388,<br>Trp398, Tyr326<br>(pi-pi)  |
| 13 | -10.3061 | Gly49,Thr52,Tyr69,<br>Met445<br>(Conventional hydrogen bond)                                                  | Tyr444,Gly66,<br>Trp397,Tyr407<br>(pi-pi)               | -8.6638 | Ser59,Leu171,<br>(Conventional hydrogen bond),Phe168,Cys178,<br>(pi-sulfur)                              | Tyr60, Tyr435,<br>Trp388, Tyr398,<br>Phe343, Tyr326<br>(pi-pi) |
| 15 | -10.9165 | Thr435,LLe23,<br>Ser24,Ars51,<br>Cys406(Conventional hydrogen bond),<br>Glu43<br>(halogen-interaction)        | Gly66,Tyr444,<br>Tyr407<br>(pi-pi)                      | -2.0772 | Thr201, Tyr435,<br>(Conventional hydrogen bond), Cys172, Tyr188,<br>(pi-sulfur)                          | Tyr398, Phe343,<br>Tyr326, Phe168<br>(pi-pi)                   |
| 16 | -6.8256  | Ars45,Ars51,<br>Ser24(Conventional hydrogen bond),<br>Cys406,Met445<br>(pi-sulfur)                            | Tyr407,<br><br>Tyr444,<br>Trp397<br>(pi-pi)             | -4.7753 | Ile199, Met436, Gln65,<br>Ser59 (Conventional hydrogen bond),<br>Cys172 (pi-sulfur)                      | Phe343, Tyr398<br>(pi-pi)                                      |
| 17 | -0.1233  | Thr435<br>(Conventional hydrogen bond)                                                                        | Tyr444<br>(pi-pi), Gly22<br>(pi-sigma)                  | 1.1810  | Gly434, Phe168<br>(Conventional hydrogen bond), Met436, Cys172<br>(pi-sulfur)                            | Phe343, Tyr398<br>(pi-pi)                                      |
| 18 | -9.6374  | Lle207,Tyr69,<br>Asn181,(Conventional hydrogen bond)<br>Cys406,Trp397<br>(pi-sulfur)                          | Tyr40,<br>Rhe352,<br>(pi-pi), Gln215,<br>(pi-lone pair) | -4.0571 | Lys296 (Conventional hydrogen bond),<br>Cys172, Tyr398 (pi-sulfur)                                       | Tyr435, Tyr326,<br>Phe343 (pi-pi)                              |
| 19 | -3.8283  | Gly443,Lle207,<br>Asn181(Conventional hydrogen bond),<br>Cys406,<br>Trp397(pi-sulfur)                         | Tyr444,<br>Tyr407,<br>Phe352<br>(pi-pi)                 | 2.1811  | Cys172, Gln65, Tyr60,<br>Ser59 (Conventional hydrogen bond)                                              | Tyr398, Tyr435<br>(pi-pi)                                      |
| 20 | -6.5063  | Ala68,Tyr69,<br>Ala272,Lle23,<br>Ser24,Ars51<br>(Conventional hydrogen bond),<br>Cys406,Met445<br>(pi-sulfur) | Tyr407,<br>Gly66<br>(pi-pi)                             | -6.2628 | Tyr326, Ile199, Tyr188<br>(Conventional hydrogen bond), Cys172 (pi-sulfur)                               | Phe343, Tyr398<br>(pi-pi)                                      |
| 21 | -3.7661  | Lle207,Asn181,<br>Tyr69,(Conventional hydrogen bond),<br>Cys406,Trp397,(pi-sulfur)                            | Phe352,<br>Tyr407,<br>Tyr444,<br>(pi-pi)                | -0.5073 | Gln206, Thr201,<br>Tyr188, Cys172,<br>(Conventional hydrogen bond), Tyr60, Lys296,<br>Phe343 (pi-sulfur) | Tyr398 (pi-pi)                                                 |
| 22 | -47365   | Ars45,Ser403,<br>Lle23,Thr52,<br>(Conventional hydrogen bond),<br>Thr435,(pi-sulfur)                          | Gln43,<br>(pi-lone pair)                                | 1.1065  | Pro102, Phe168,<br>(Conventional hydrogen bond), Cys172, Phe343,<br>Tyr60 (pi-sulfur)                    | ----                                                           |
| 23 | -11.0394 | Cys406,Tyr69,<br>Gly67,Ars51,<br>Ser403,Ars45<br>(Conventional                                                | Tyr407,<br>Gln66,<br>Trp397,<br>Tyr444,                 |         | Tyr60, Cys296, Gly205,<br>Gln206 (Conventional hydrogen bond),<br>Cys397 (pi-sulfur)                     | Gly57, Tyr398,<br>Tyr435, Phe343<br>(pi-pi)                    |

|    |          |                                                                                                                |                                      |         |                                                                         |                           |
|----|----------|----------------------------------------------------------------------------------------------------------------|--------------------------------------|---------|-------------------------------------------------------------------------|---------------------------|
|    |          | hydrogen bond)                                                                                                 | Tyr402,<br>(pi-pi)                   | -3.7149 |                                                                         |                           |
| 24 | -4.5861  | Ars45,Ser403,<br>Ars51,Gly49,<br>(Conventional<br>hydrogen bond),<br>Tyr407(pi-sulfur)                         | Trp397,<br>Gly66,<br>(pi-pi)         | -4.8501 | Cys397, Tyr398,<br>Cys172 (Conventional<br>hydrogen bond)               | Trp388 (pi-pi)            |
| 25 | -10.3947 | Tyr69, Ars51,<br>Thr52, Gly49,<br>Ser24(Conventional<br>hydrogen bond),<br>Cys407, Met445,<br>Lle23(pi-sulfur) | Tyr444,<br>Tyr407,<br>Trp397 (pi-pi) | -3.2324 | Tyr60, Ser59<br>(Conventional hydrogen<br>bond), Cys172 (pi-<br>sulfur) | Tyr398, Tyr326<br>(pi-pi) |

**Table S6 7: Data of ligand interaction with different targeted enzymes LOX-5 and COX-2**

| Codes | Binding energy kJ/mol | Hydrogen bond interactions                                                                 | Hydrophilic interactions                             | Binding energy KJ/mol | Hydrogen bond interactions                                                                          | Hydrophilic interactions                      |
|-------|-----------------------|--------------------------------------------------------------------------------------------|------------------------------------------------------|-----------------------|-----------------------------------------------------------------------------------------------------|-----------------------------------------------|
|       |                       | <b>COX-2</b>                                                                               |                                                      |                       | <b>LOX-5</b>                                                                                        |                                               |
| 09    | -7.6938               | Ile517, Ser353,<br>His90, Tyr355<br>(Conventional<br>hydrogen bond)                        | Gly526, Phe518<br>(pi-pi)                            | -5.8788               | Arg596,<br>is600,Lys296, Gln303<br>(Conventional<br>hydrogen bond)                                  | His432, Trp599,<br>(pi-pi)                    |
| 10    | -7.6582               | Arg120, Ser530,<br>Tyr355,<br>(Conventional<br>hydrogen bond),<br>Met522, (pi-<br>sulfur)  | Trp387,<br>Gly526, (pi-pi),<br>Ser353 (pi-<br>sigma) | -6.2530               | Pro569, Arg596,<br>(Conventional<br>hydrogen bond)                                                  | Trp599, His435<br>(pi-pi)                     |
| 12    | -6.0783               | Val523, Gln192,<br>Tyr355,<br>(Conventional<br>hydrogen bond)                              | Gly526 (pi-pi),<br>Leu531 (pi-<br>sigma)             | -7.1918               | Thr364, Asn407<br>(Conventional<br>hydrogen bond)                                                   | His432, Trp599,<br>Phe359, His372<br>(pi-pi), |
| 13    | -4.6521               | Gln192, Leu352,<br>Arg513, Tyr355<br>(Conventional<br>hydrogen bond),<br>His90 (pi-sulfur) | Glu526,<br>Phe518, (pi-pi),<br>Ser303 (pi-<br>sigma) | -6.6865               | Ile673, Asn407,<br>Arg596 (Conventional<br>hydrogen bond),<br>Phe359, His600,<br>Trp599 (pi-sulfur) | Ala410 (pi-pi)                                |
| 15    | -23.2472              | Gln192, Tyr355<br>(Conventional<br>hydrogen bond)                                          | Asp515,<br>Gly526 (pi-pi)                            | -7.7092               | Arg596, Lys296,<br>(Conventional<br>hydrogen bond),<br>His432 (pi-sulfur)                           | Ala410, Phe359,<br>Trpo599 (pi-pi)            |

|    |         |                                                                                                                         |       |         |                                                                                  |                              |
|----|---------|-------------------------------------------------------------------------------------------------------------------------|-------|---------|----------------------------------------------------------------------------------|------------------------------|
| 16 | 13.4101 | Tyr385, Thr94,<br>Gly354, Tyr355,<br>Arg120<br>(Conventional<br>hydrogen bond),<br>His90, Phe381,<br>Ser530 (pi-sulfur) | ----- | -8.3160 | Arg596, Gln303,<br>His360 (Conventional<br>hydrogen bond),<br>Phe359 (pi-sulfur) | Ala410, Leu414<br>(pi-sigma) |
|----|---------|-------------------------------------------------------------------------------------------------------------------------|-------|---------|----------------------------------------------------------------------------------|------------------------------|

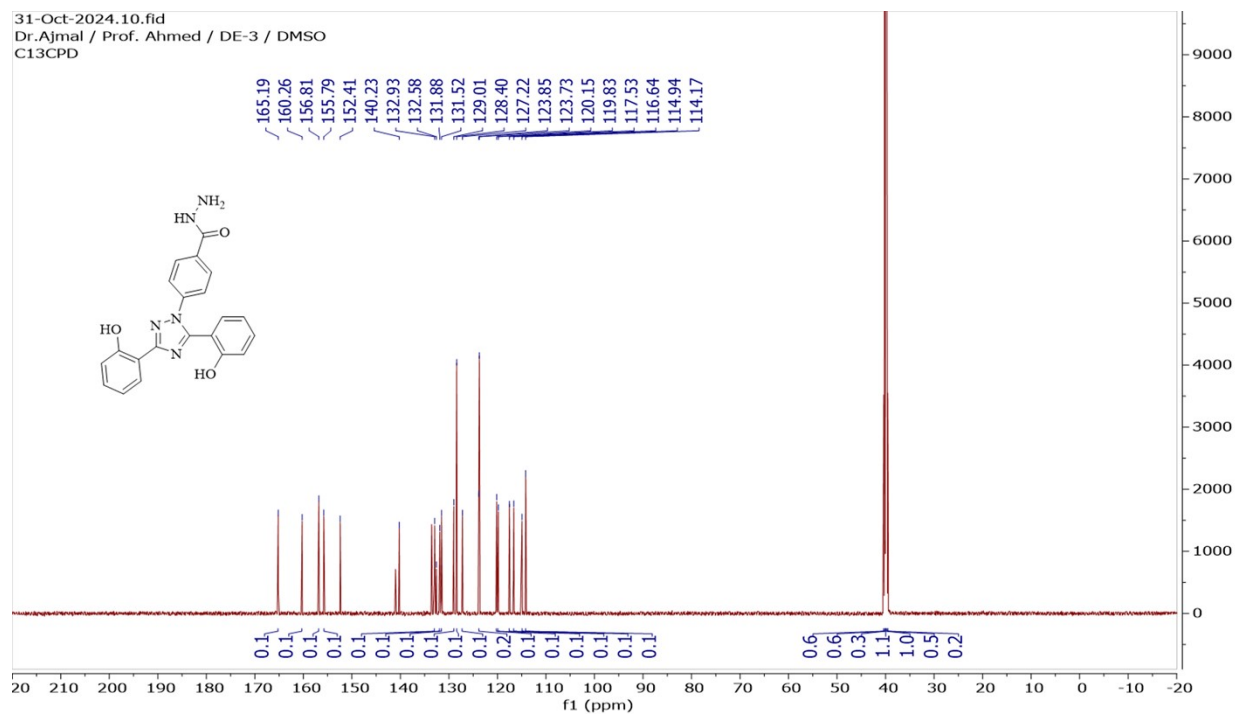

Figure S1.  $C^{13}$  NMR of compound 11

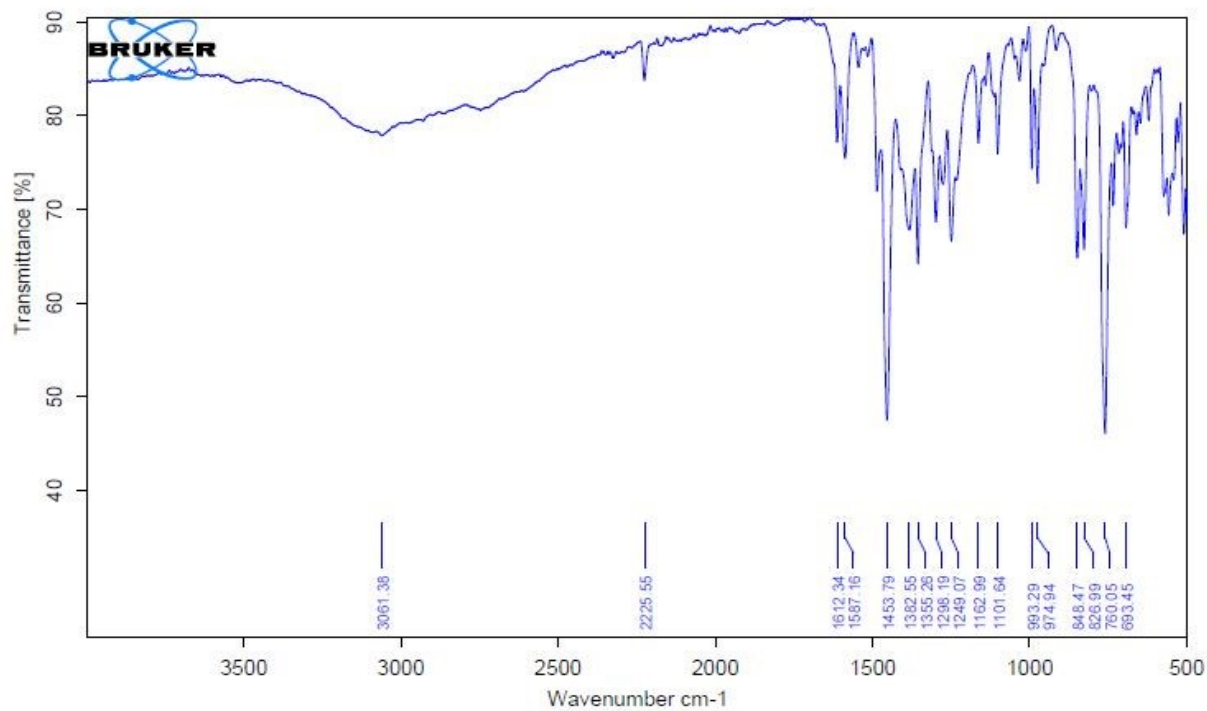

Figure S2: FTIR of compound 15

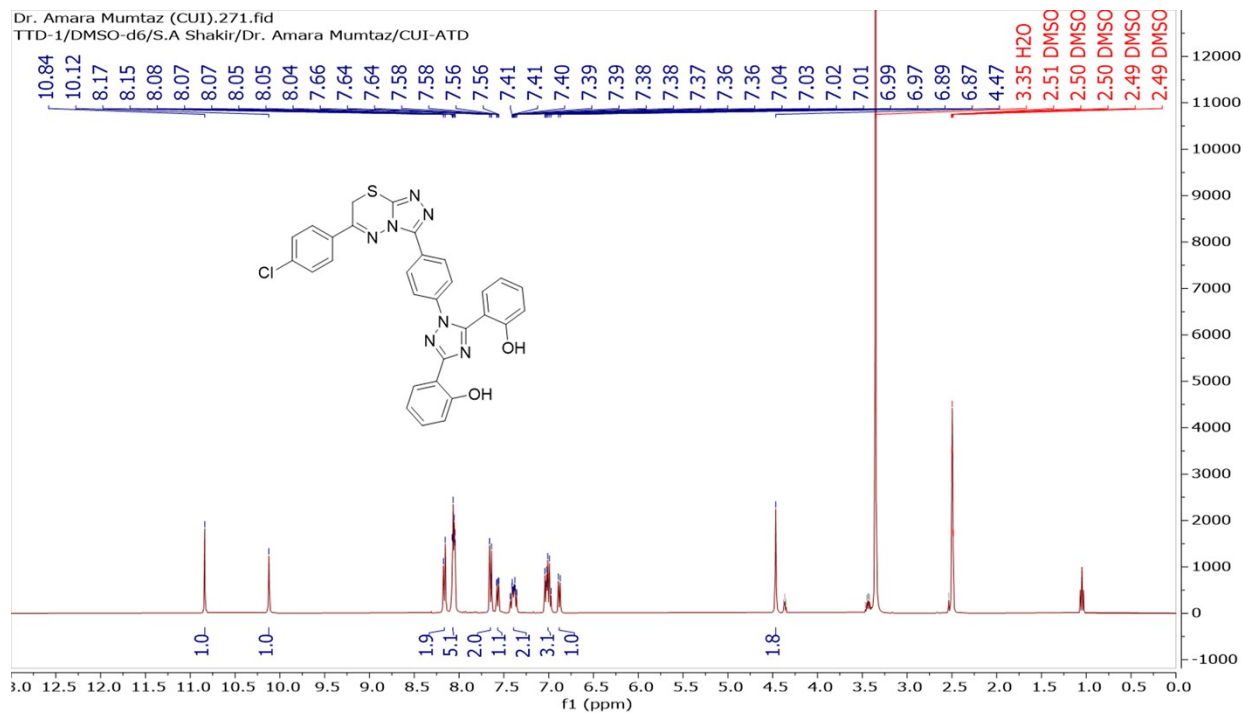

Figure S3: <sup>1</sup>H NMR of compound 15



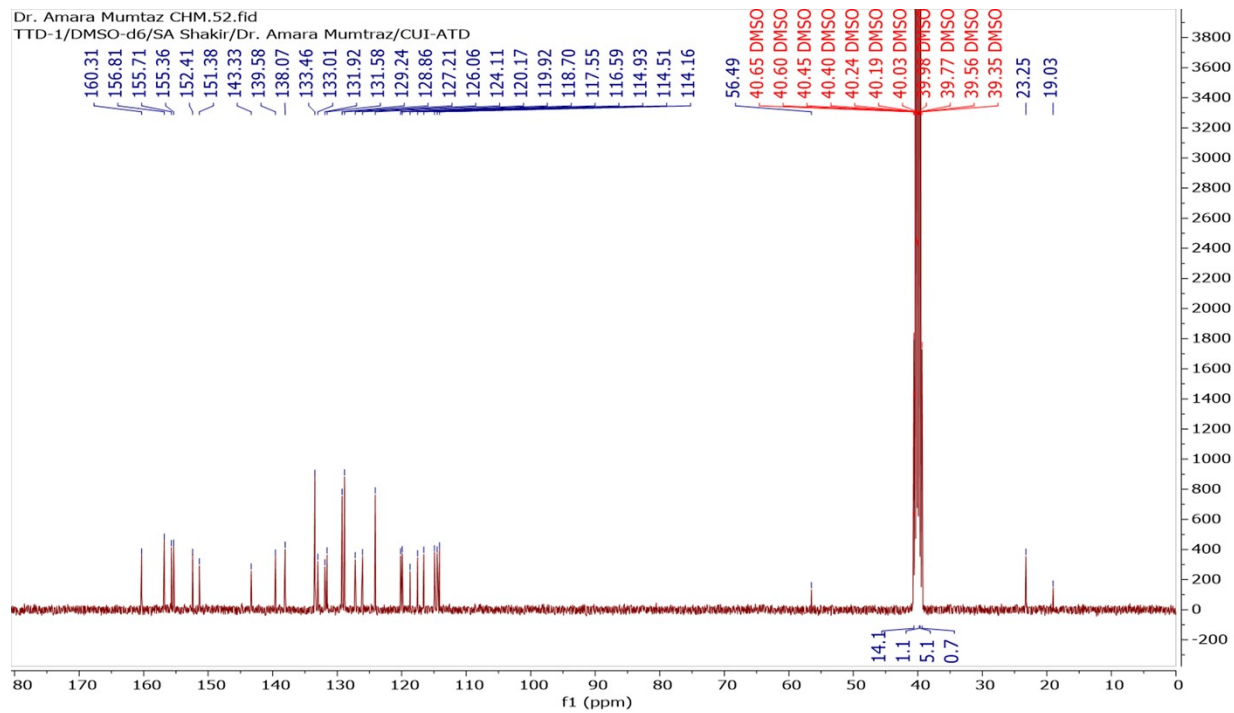

Figure S4:  $^{13}\text{C}$  NMR of compound 15

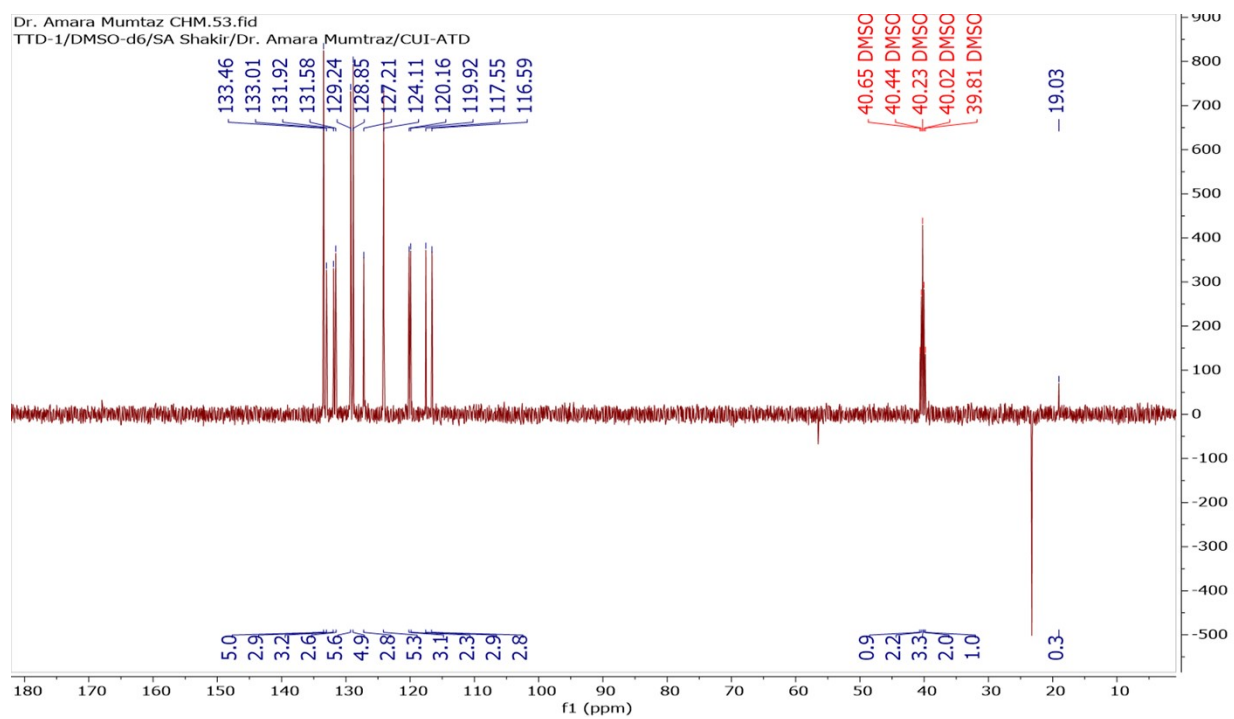

Figure S5: DEPT-135 NMR of compound 15

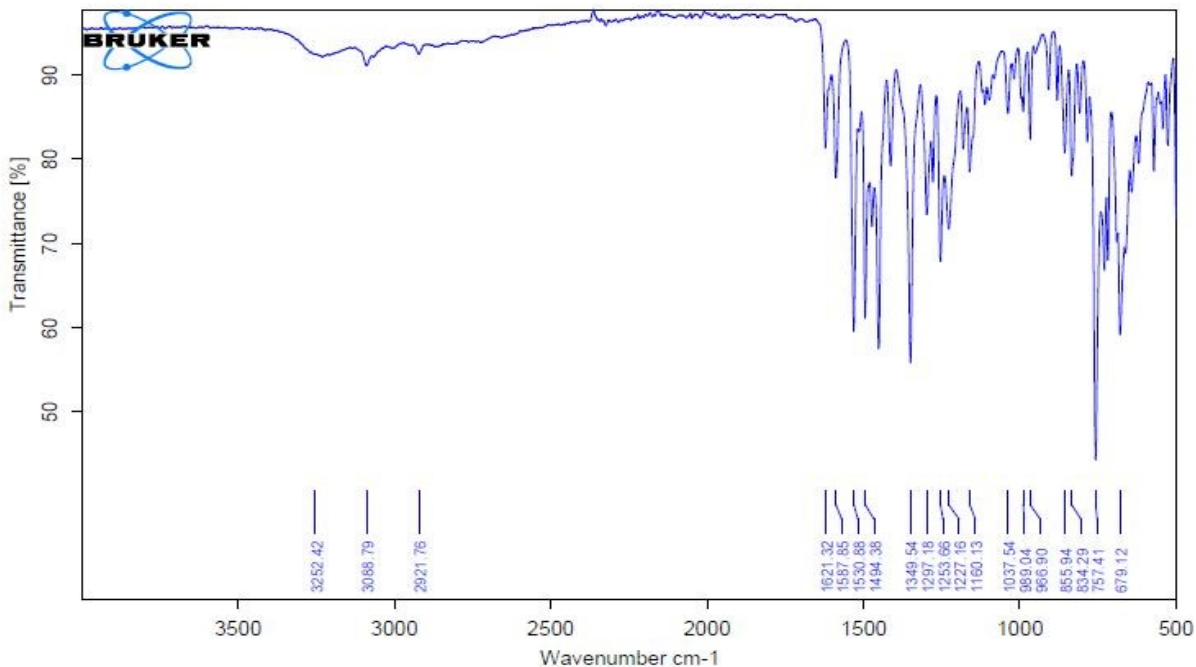

Figure S6: FTIR of compound 16

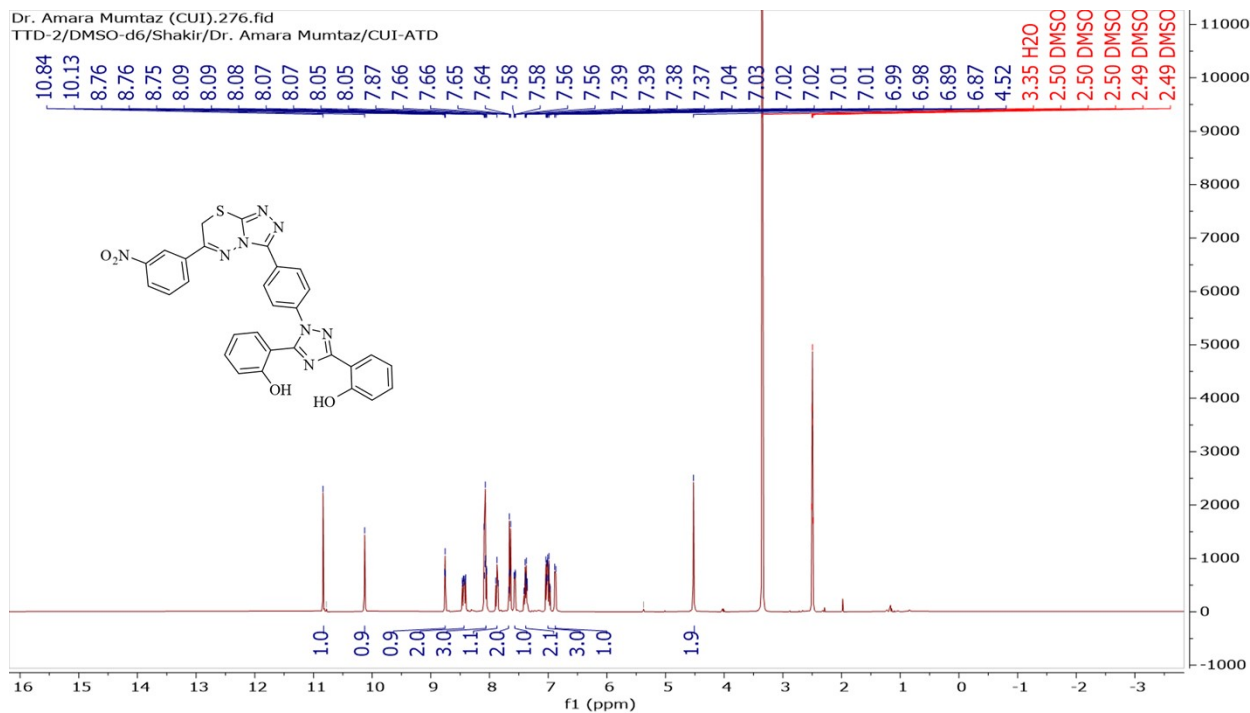

Figure S7: <sup>1</sup>H NMR of compound 16

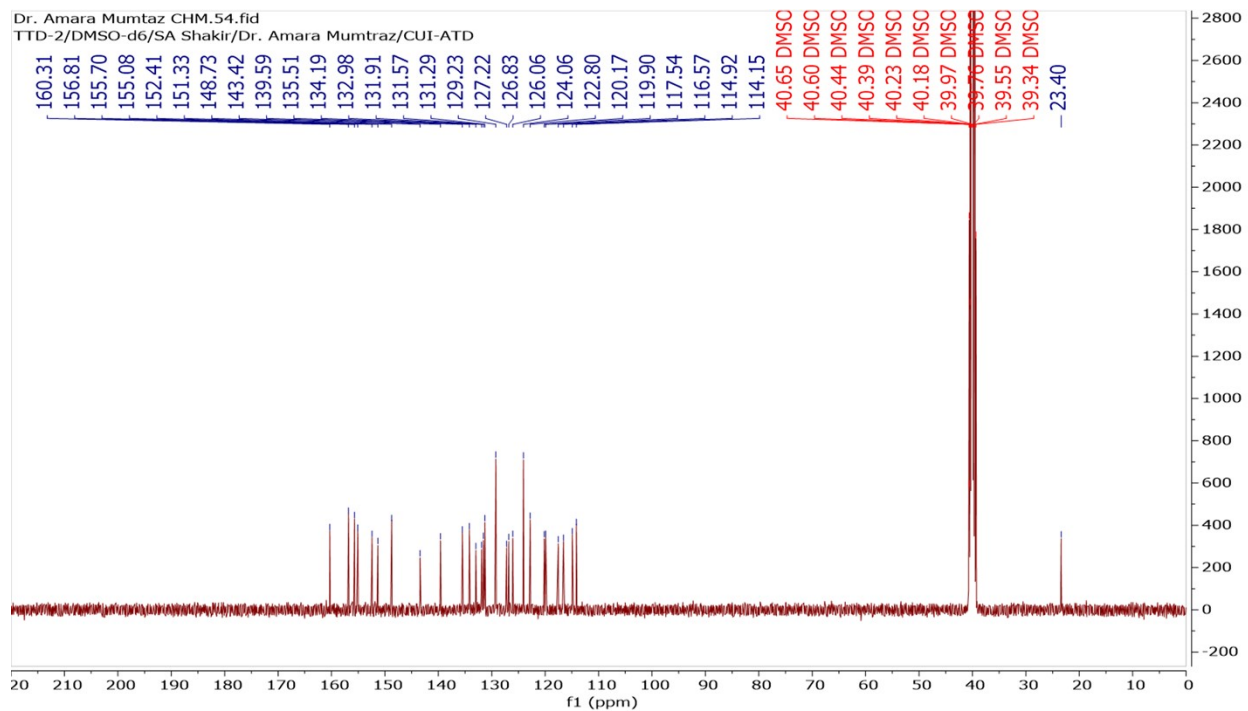

Figure S8:  $^{13}\text{C}$  NMR of compound 16

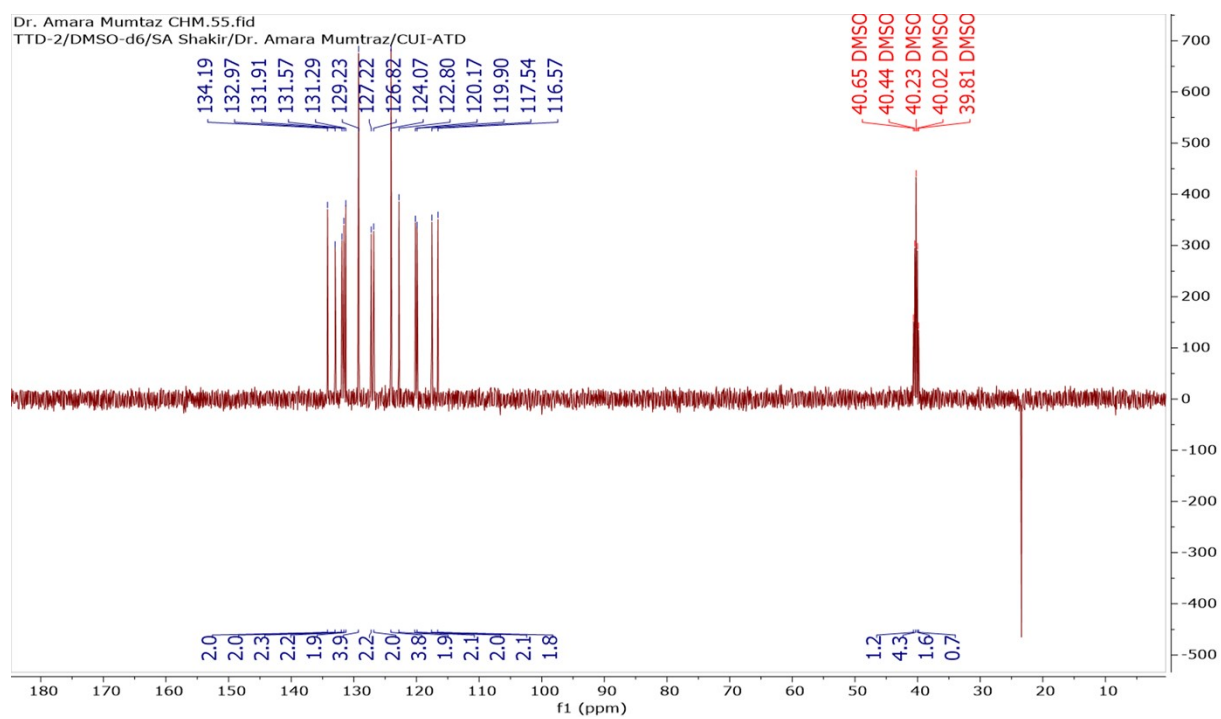

Figure S8: DEPT-135 NMR of compound 16

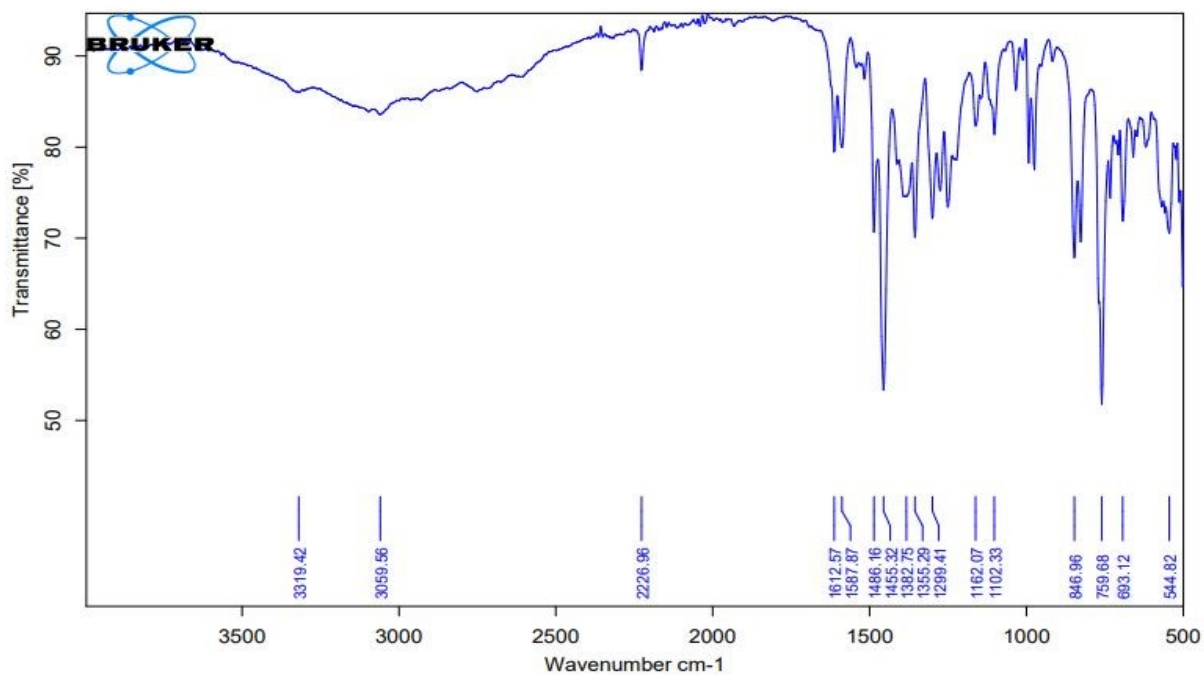

Figure S10: FTIR of compound 17

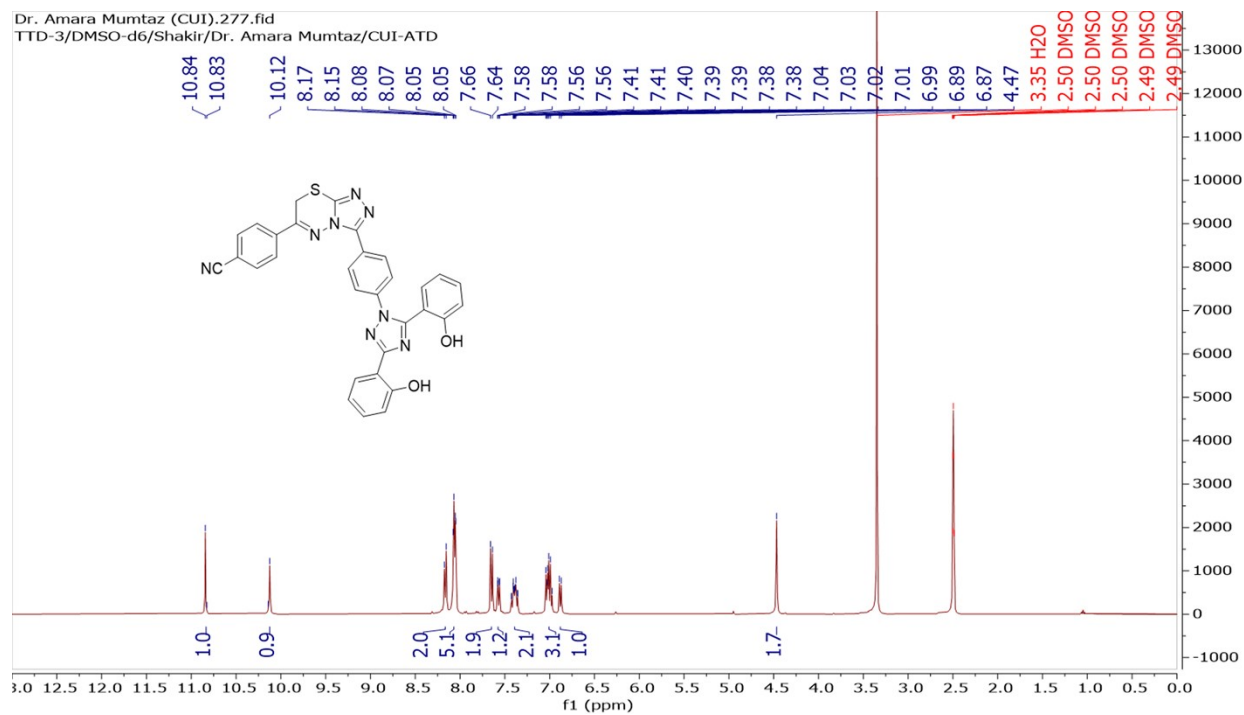

Figure S11:  $^1\text{H}$  NMR of compound 17

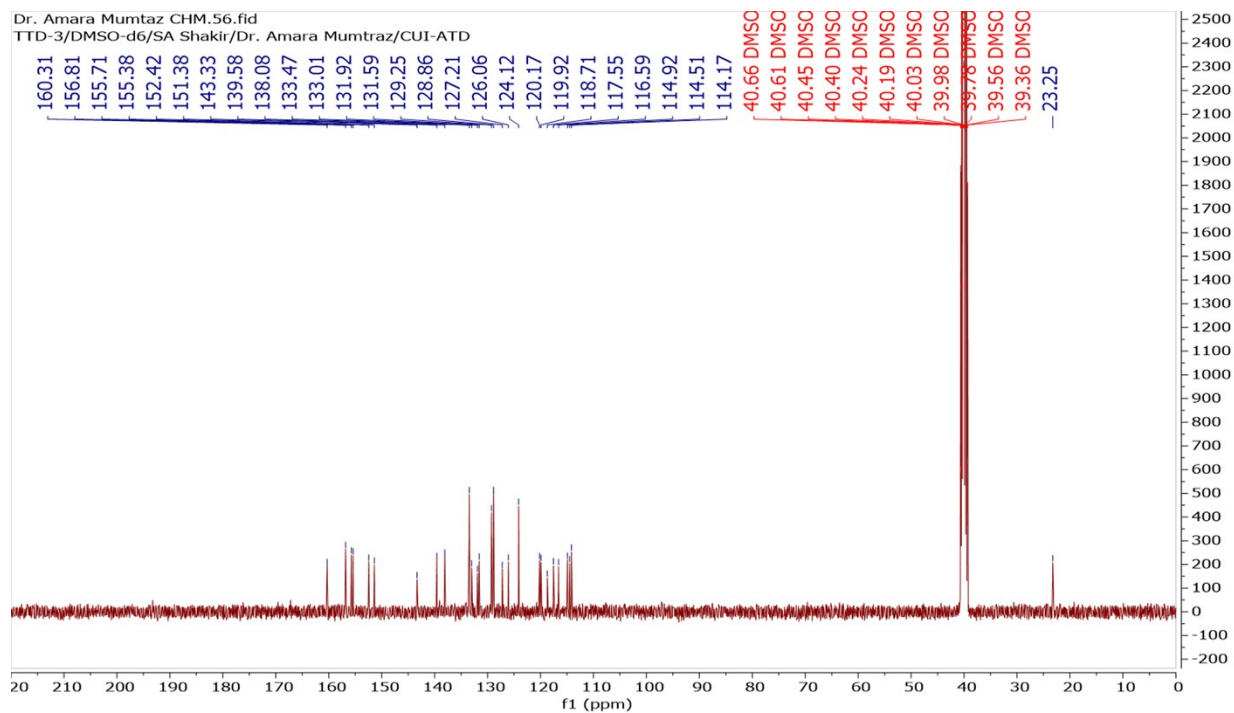

Figure S12:  $^{13}\text{C}$ NMR of compound 17

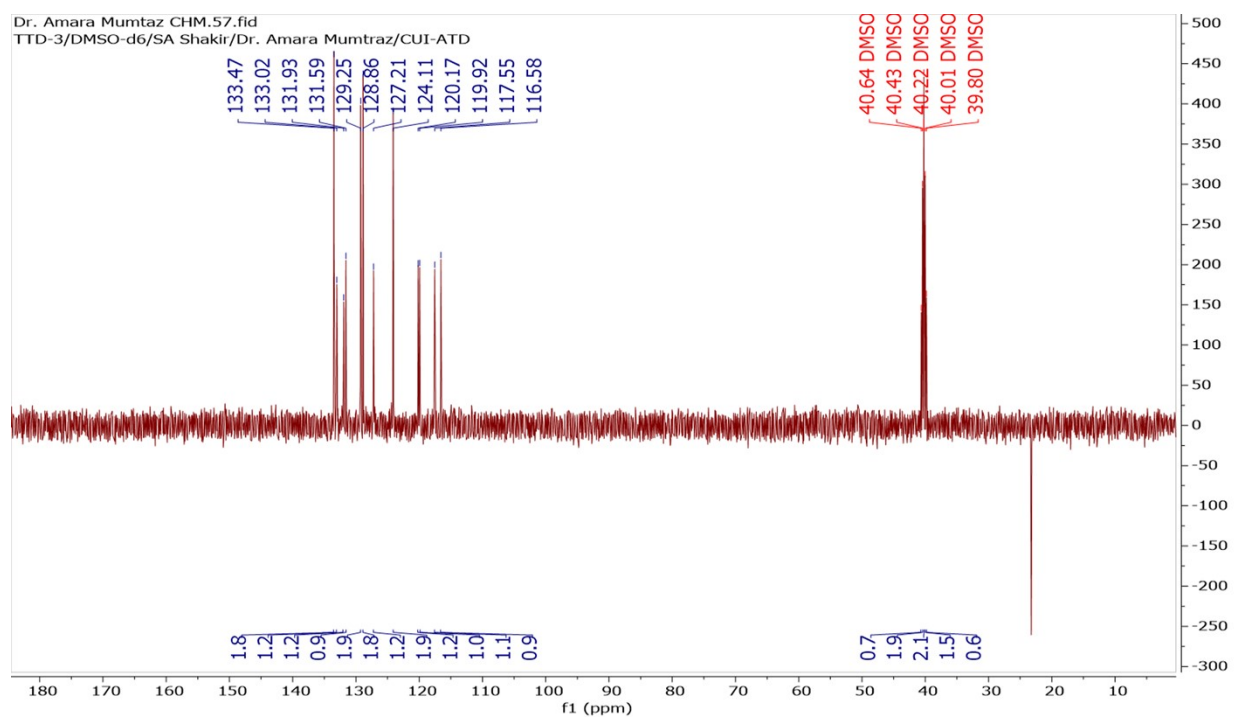

Figure S13: DEPT-135 NMR of compound 17

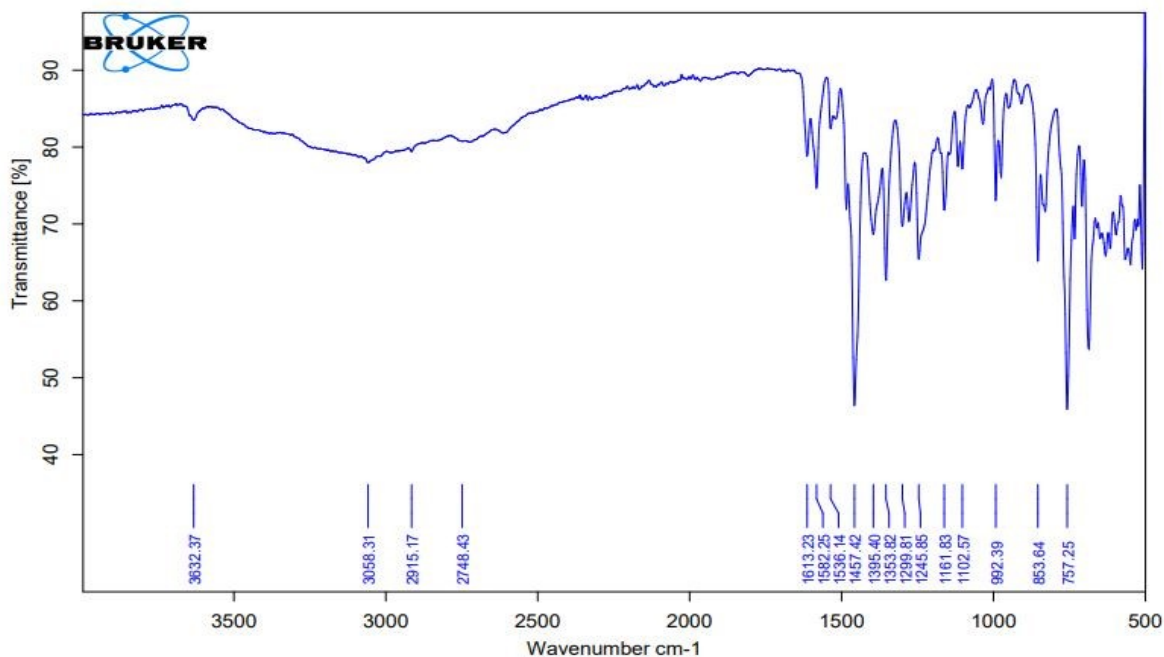

Figure S14: FTIR of compound 18

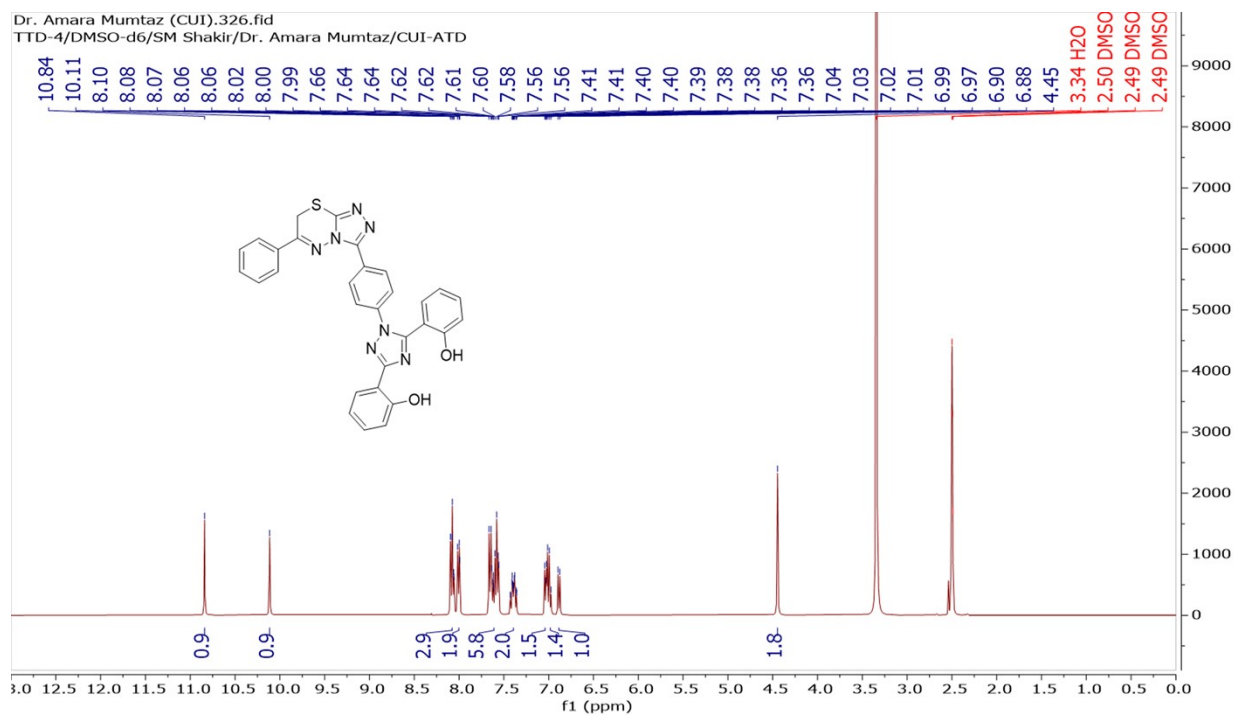

Figure S15: <sup>1</sup>H NMR of compound 18

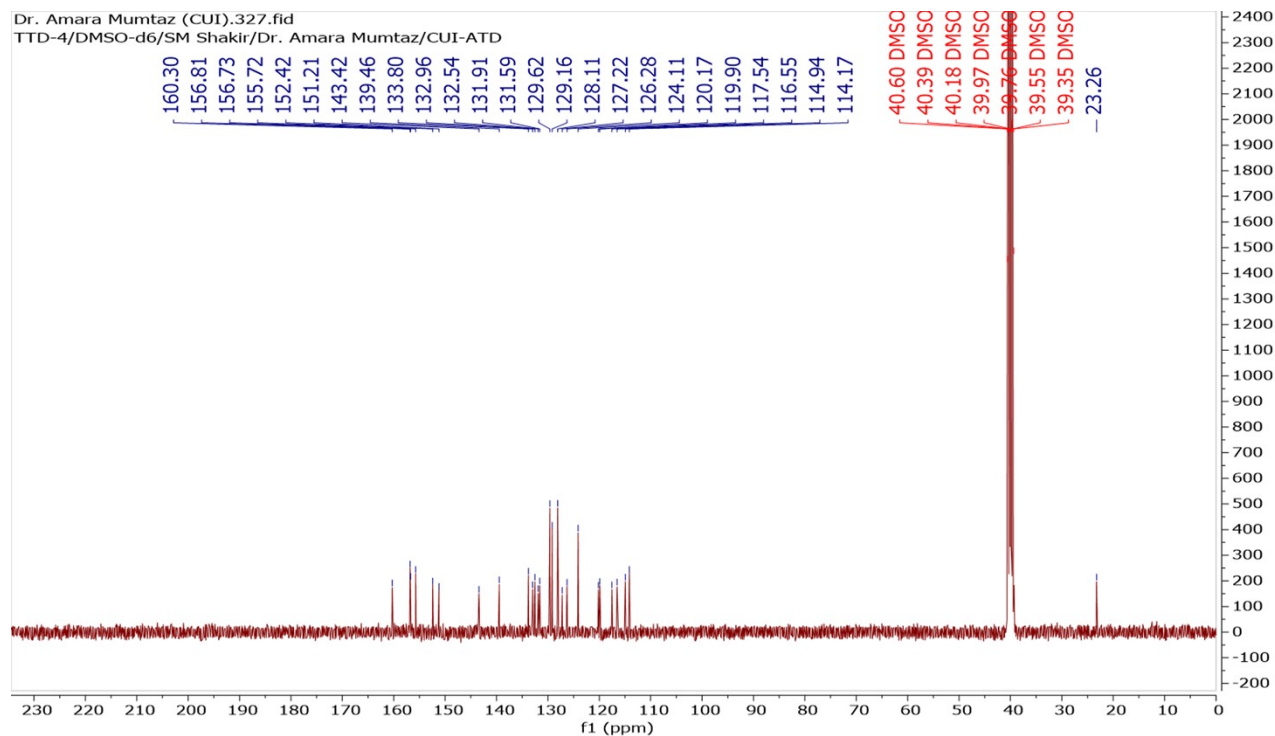

Figure S16:  $^{13}\text{C}$  NMR of compound 18

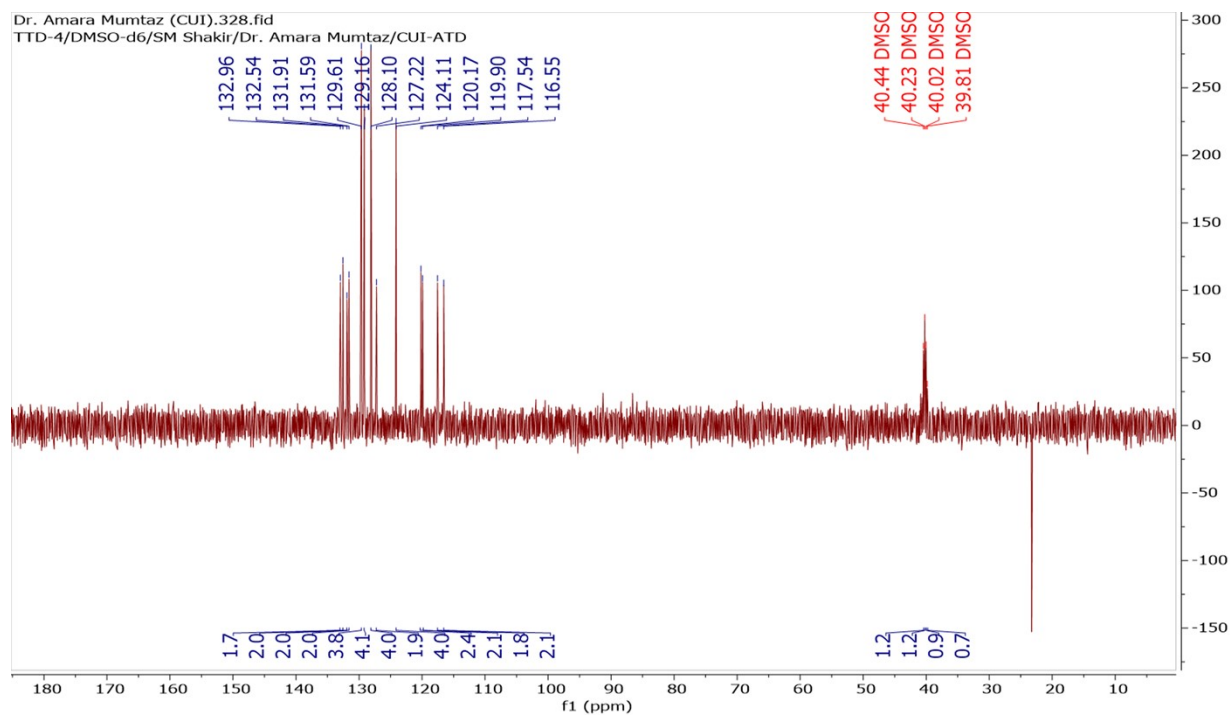

Figure S17: DEPT-135 NMR of compound 18

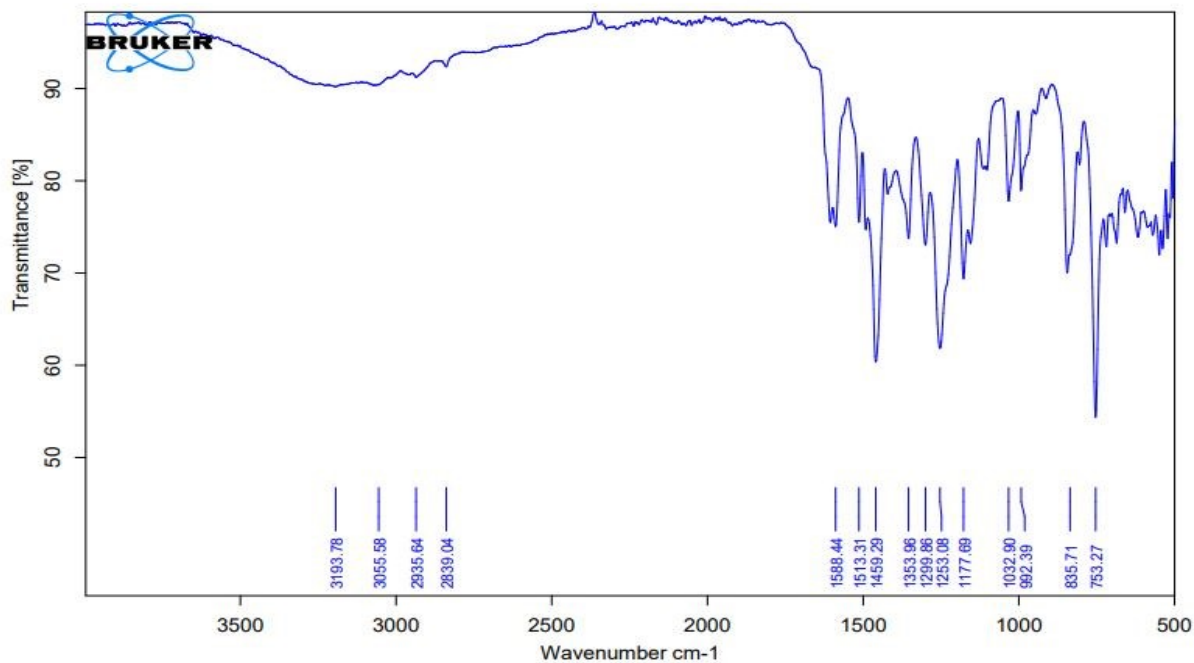

Figure S18: FTIR of compound 19

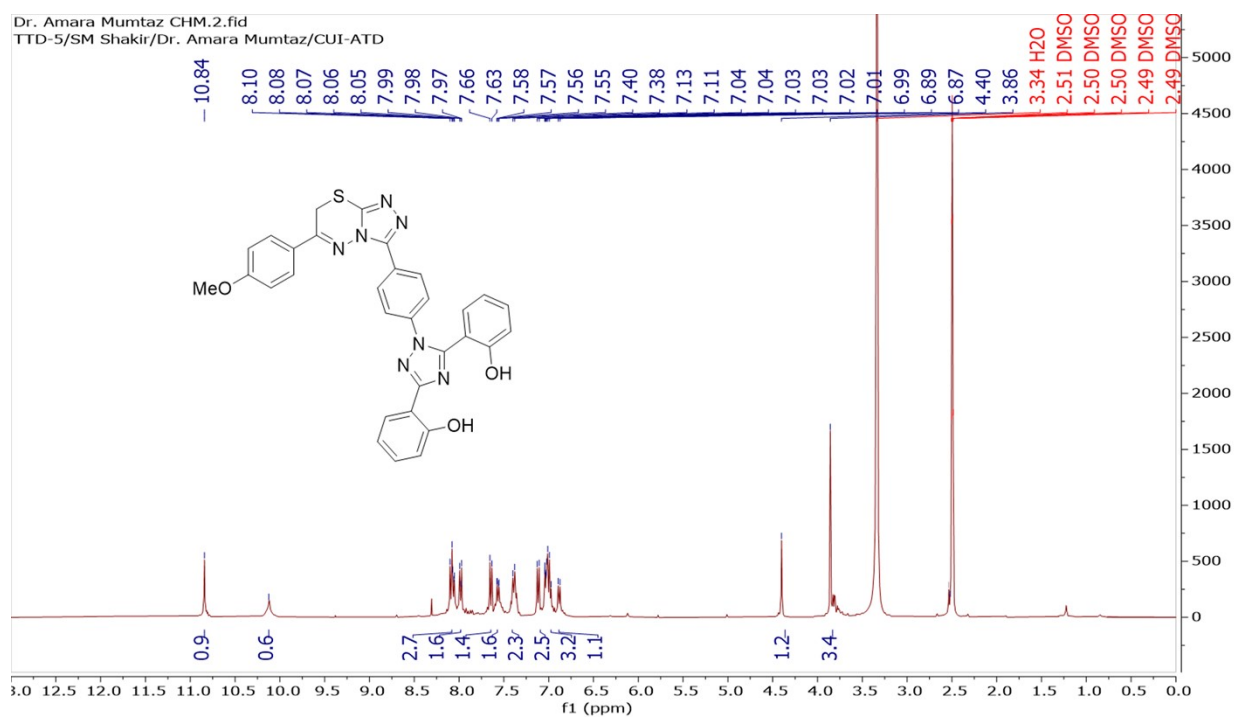

Figure S19: <sup>1</sup>H NMR of compound 19



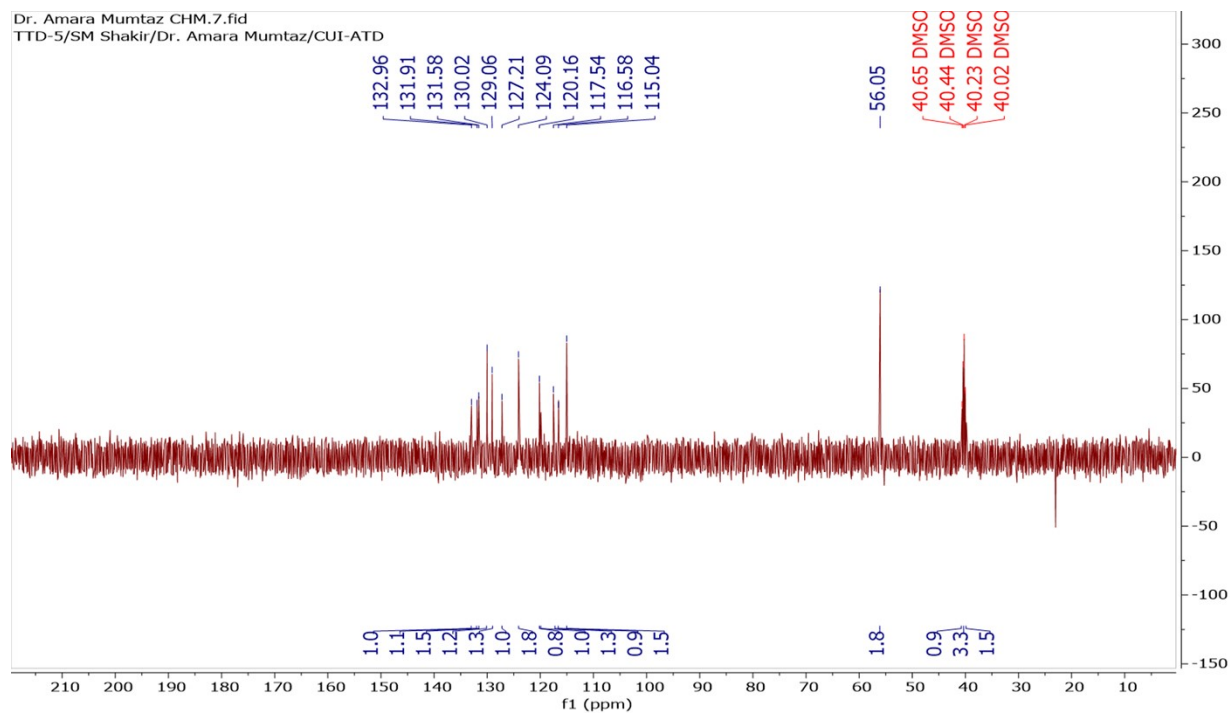

Figure S20: DEPT-135 NMR of compound 19

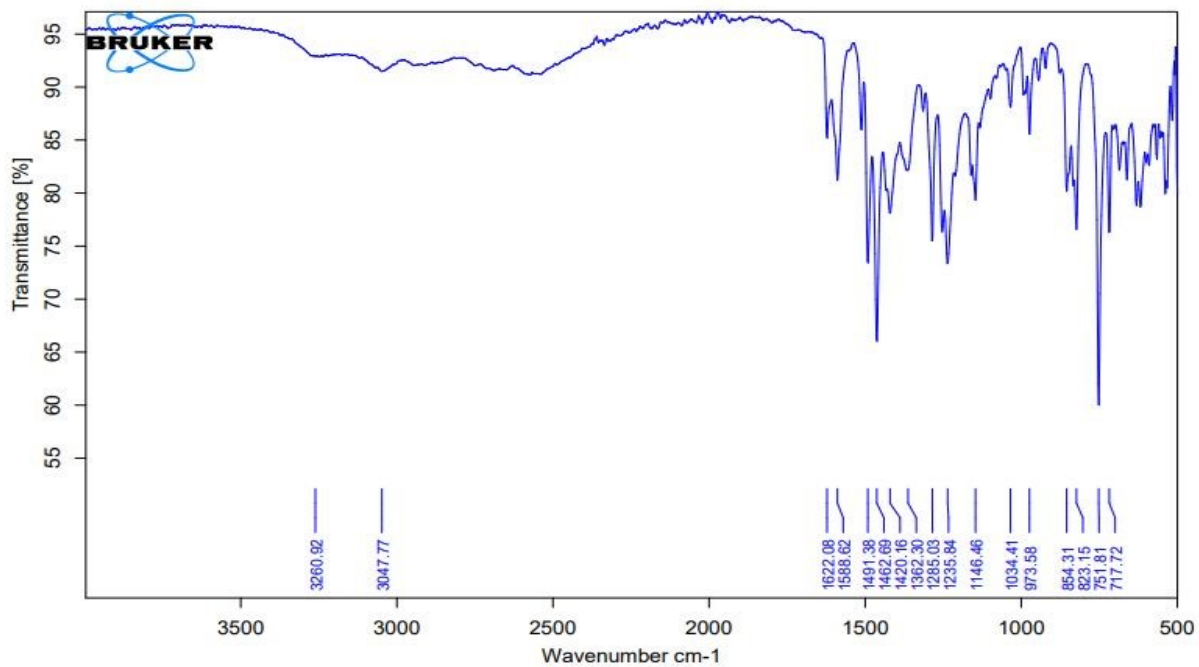

Figure S21: FTIR of compound 20

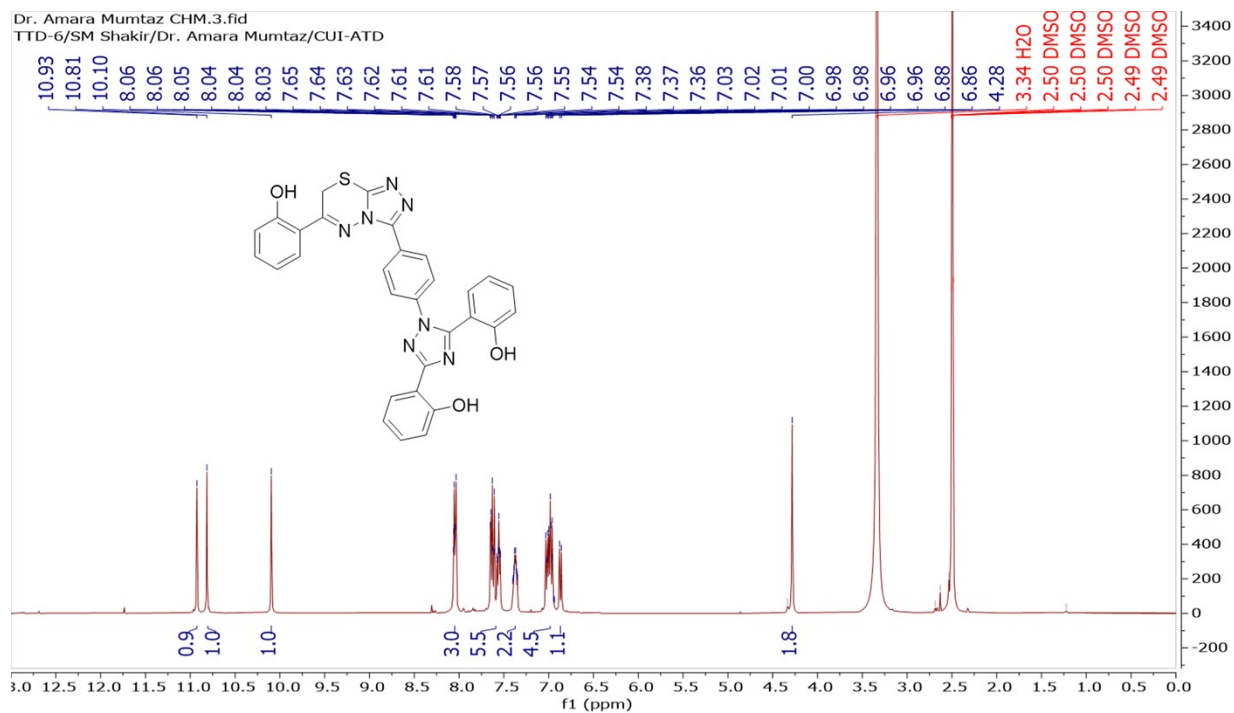

Figure S22:  $^1\text{H}$  NMR of compound 20

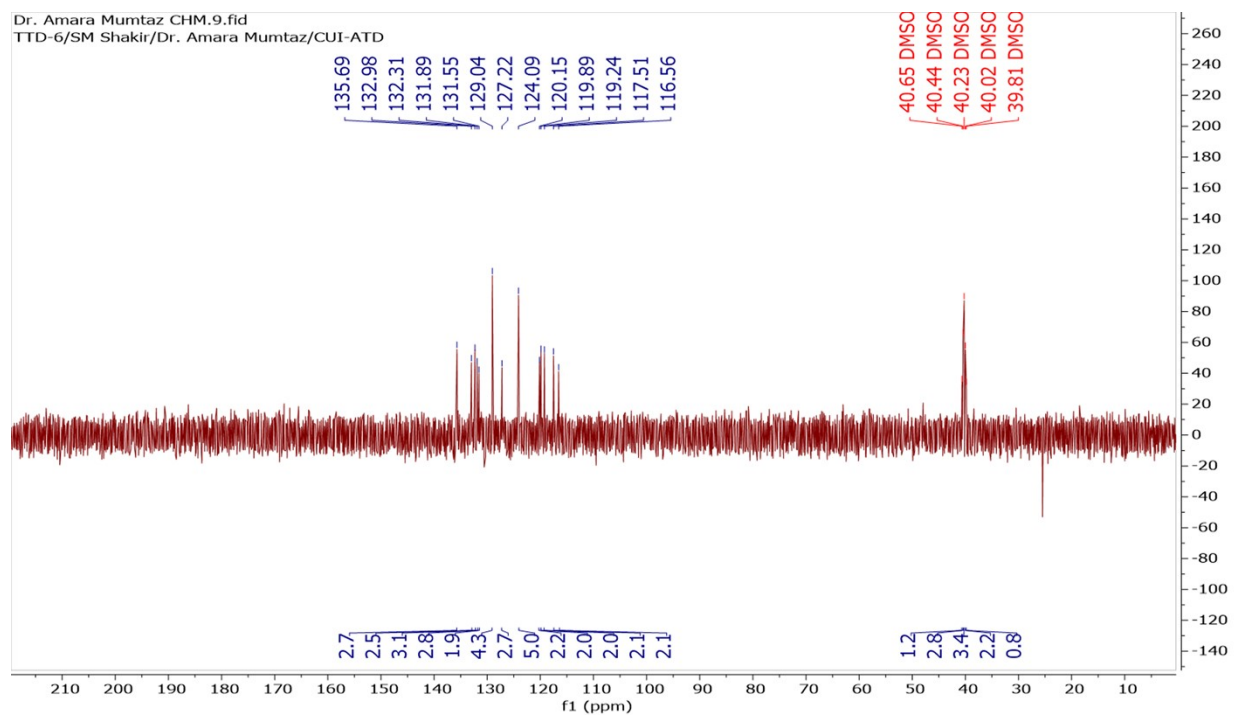

Figure S23: DEPT-135 NMR of compound 20

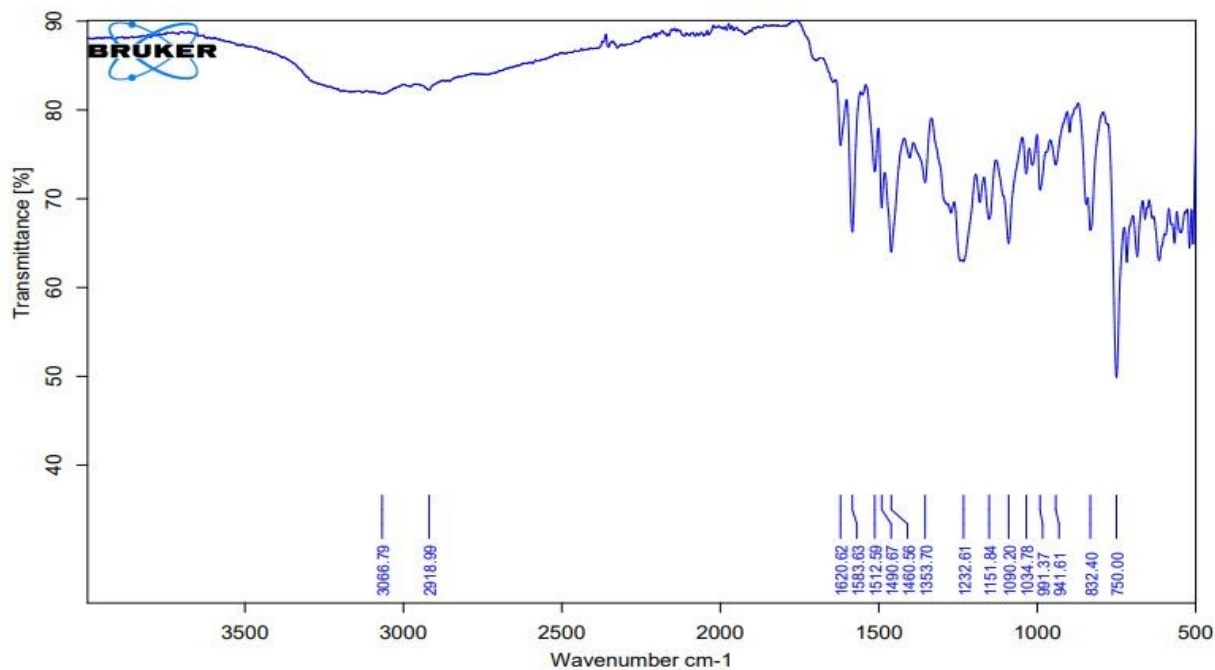

Figure S24: FTIR of compound 21

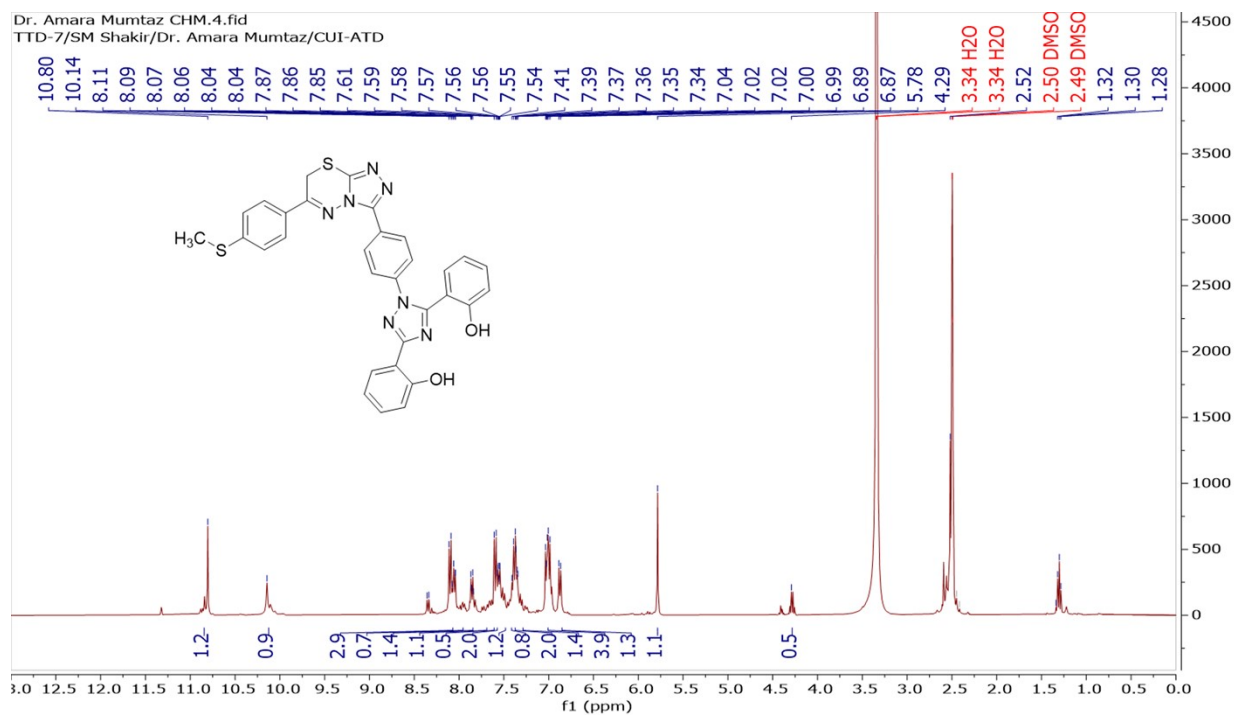

Figure S25: <sup>1</sup>H NMR of compound 21

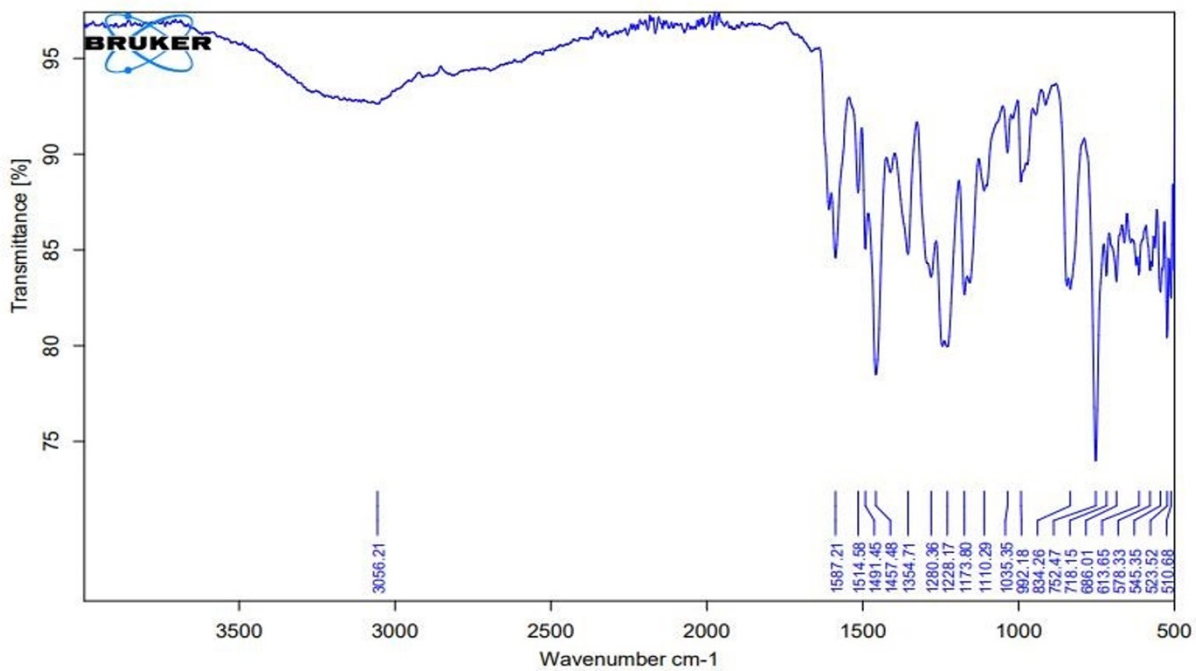

Figure S26: FTIR of compound 24

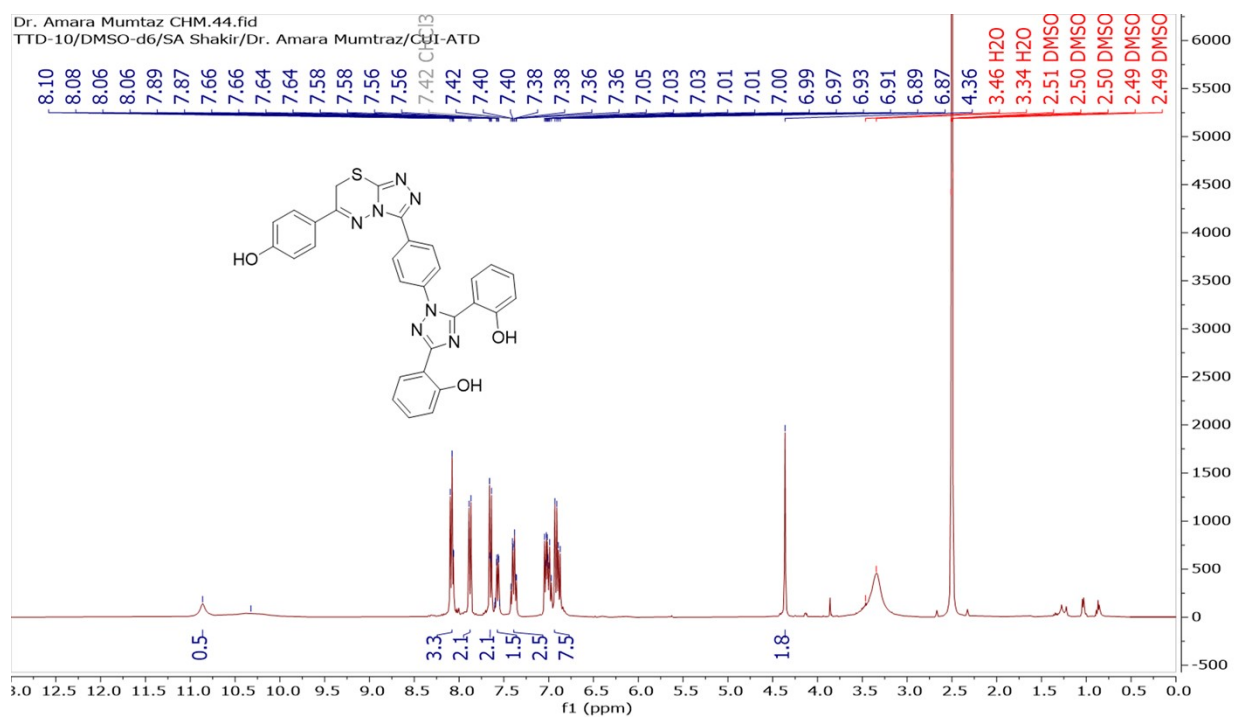

Figure S27: <sup>1</sup>H NMR of compound 24

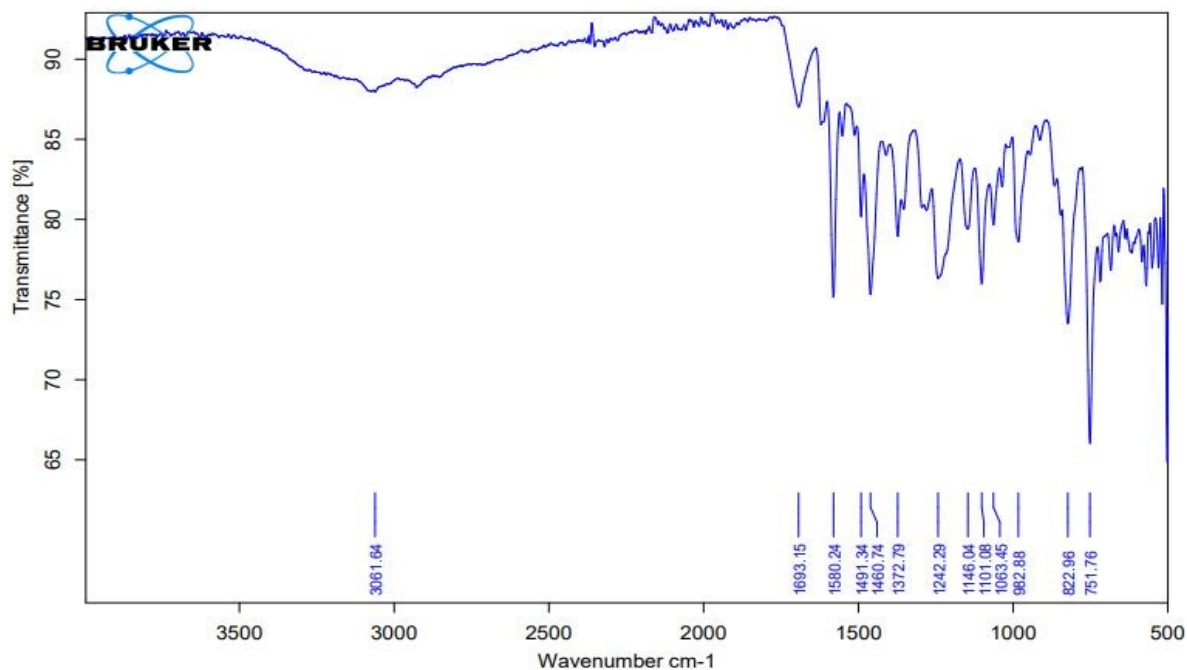

Figure S28: FTIR of compound 25

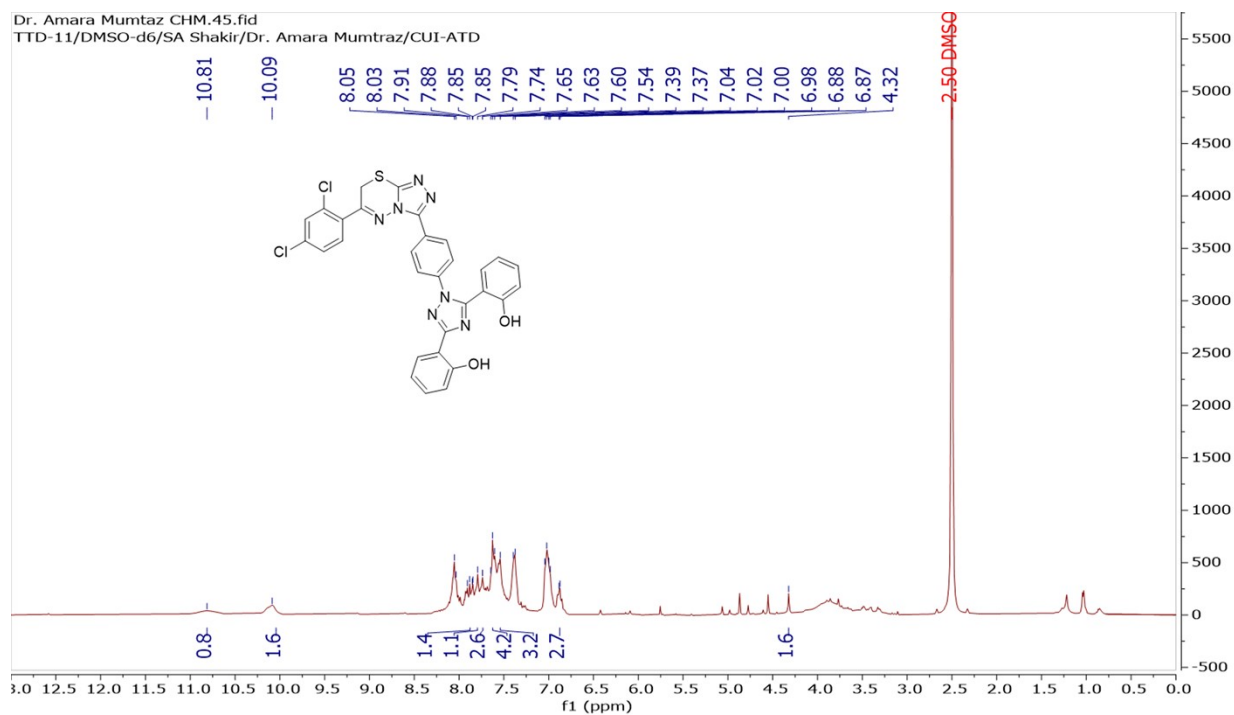

Figure S29 : <sup>1</sup>H NMR of compound 25

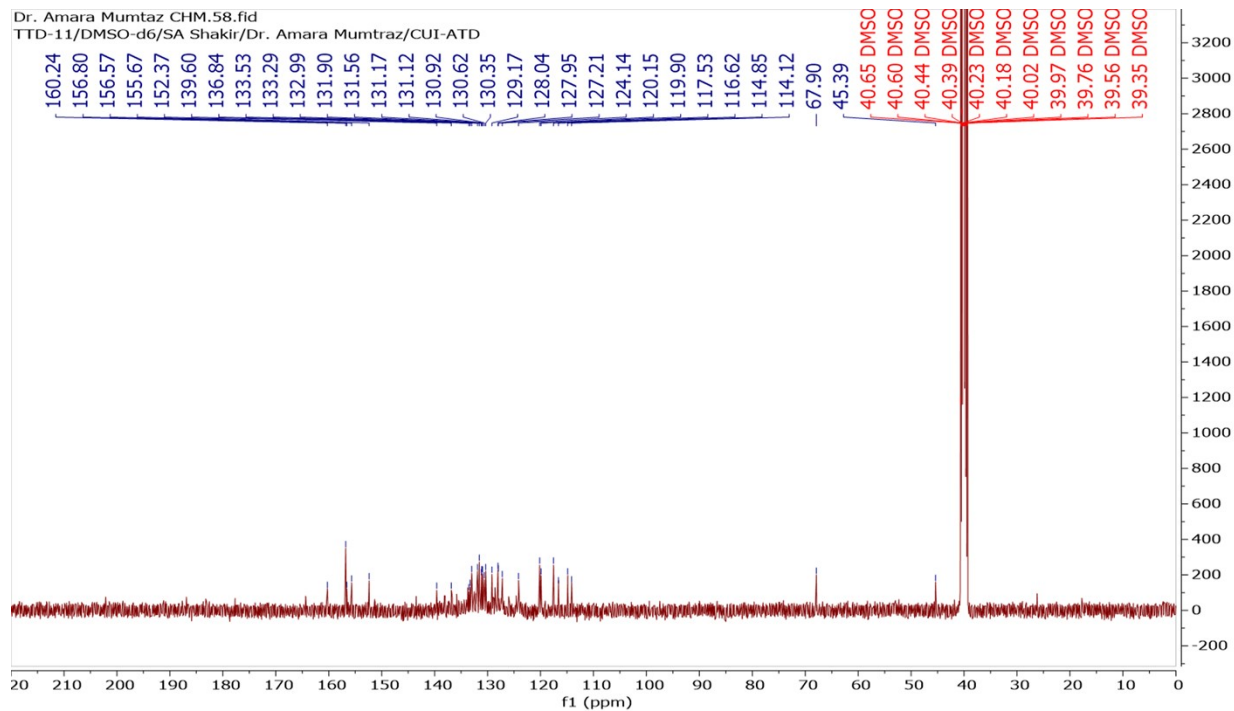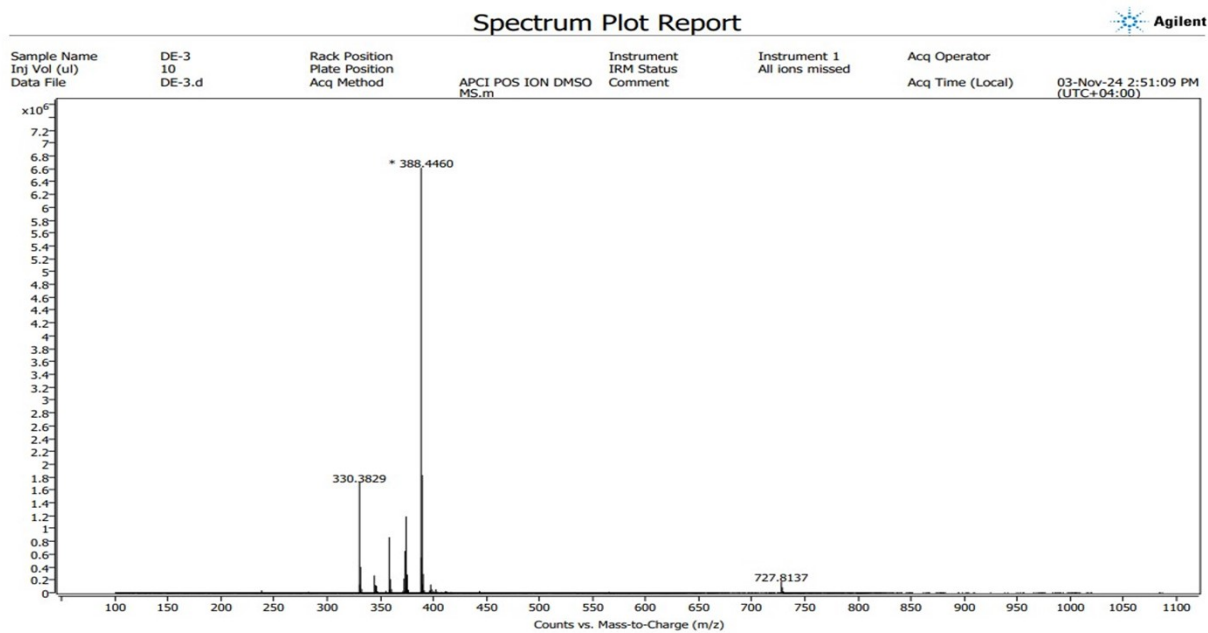

# Spectrum Plot Report

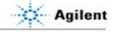

|              |         |                |                        |            |                 |                  |                                  |
|--------------|---------|----------------|------------------------|------------|-----------------|------------------|----------------------------------|
| Sample Name  | TTD-1   | Rack Position  |                        | Instrument | Instrument 1    | Acq Operator     |                                  |
| Inj Vol (ul) | 10      | Plate Position |                        | IRM Status | All ions missed |                  |                                  |
| Data File    | TTD-1.d | Acq Method     | APCI POS ION DMSO MS.m | Comment    |                 | Acq Time (Local) | 03-Nov-24 2:02:24 PM (UTC+04:00) |

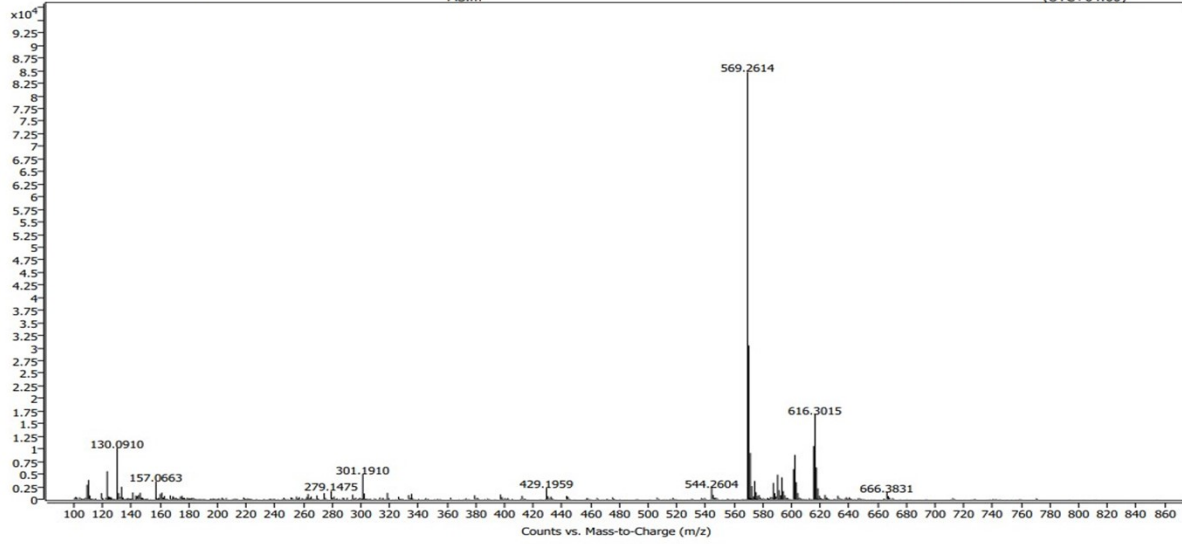

Page 1 of 1

Generated at 9:56 AM on 04-Nov-24

## Figure S32. HRMS Spectrum of 15

# Spectrum Plot Report

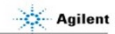

|              |         |                |                        |            |                 |                  |                                  |
|--------------|---------|----------------|------------------------|------------|-----------------|------------------|----------------------------------|
| Sample Name  | TTD-2   | Rack Position  |                        | Instrument | Instrument 1    | Acq Operator     |                                  |
| Inj Vol (ul) | 10      | Plate Position |                        | IRM Status | All ions missed |                  |                                  |
| Data File    | TTD-2.d | Acq Method     | APCI POS ION DMSO MS.m | Comment    |                 | Acq Time (Local) | 03-Nov-24 2:07:42 PM (UTC+04:00) |

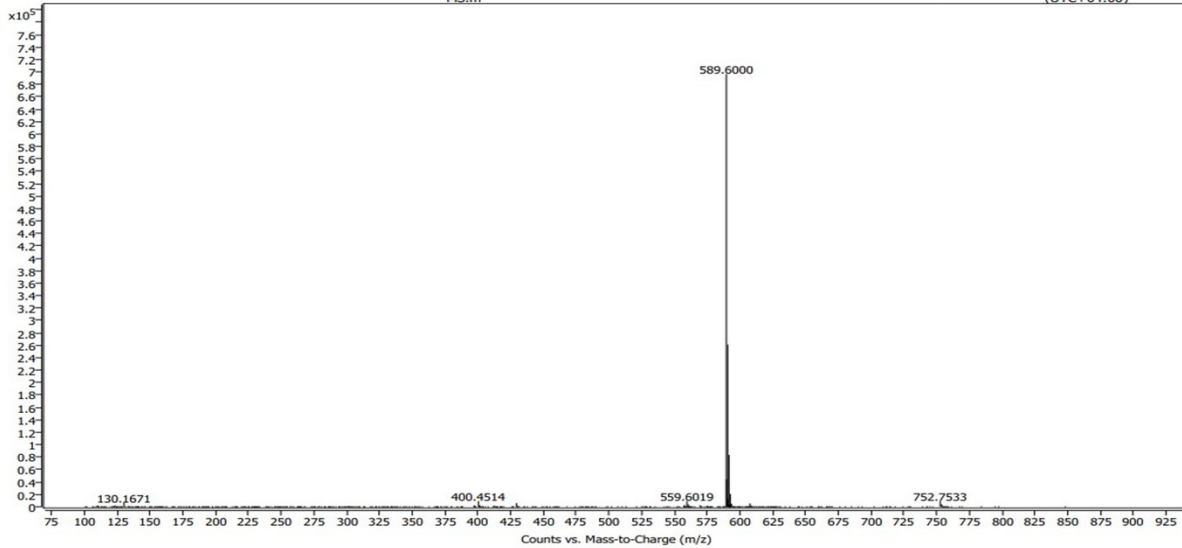

Page 1 of 1

Generated at 9:42 AM on 04-Nov-24

## Figure S33. HRMS Spectrum of 16

# Spectrum Plot Report

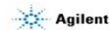

|              |         |                |                        |            |                 |                  |                                  |
|--------------|---------|----------------|------------------------|------------|-----------------|------------------|----------------------------------|
| Sample Name  | TTD-3   | Rack Position  |                        | Instrument | Instrument 1    | Acq Operator     |                                  |
| Inj Vol (ul) | 10      | Plate Position |                        | IRM Status | All ions missed |                  |                                  |
| Data File    | TTD-3.d | Acq Method     | APCI POS ION DMSO MS.m | Comment    |                 | Acq Time (Local) | 03-Nov-24 2:13:07 PM (UTC+04:00) |

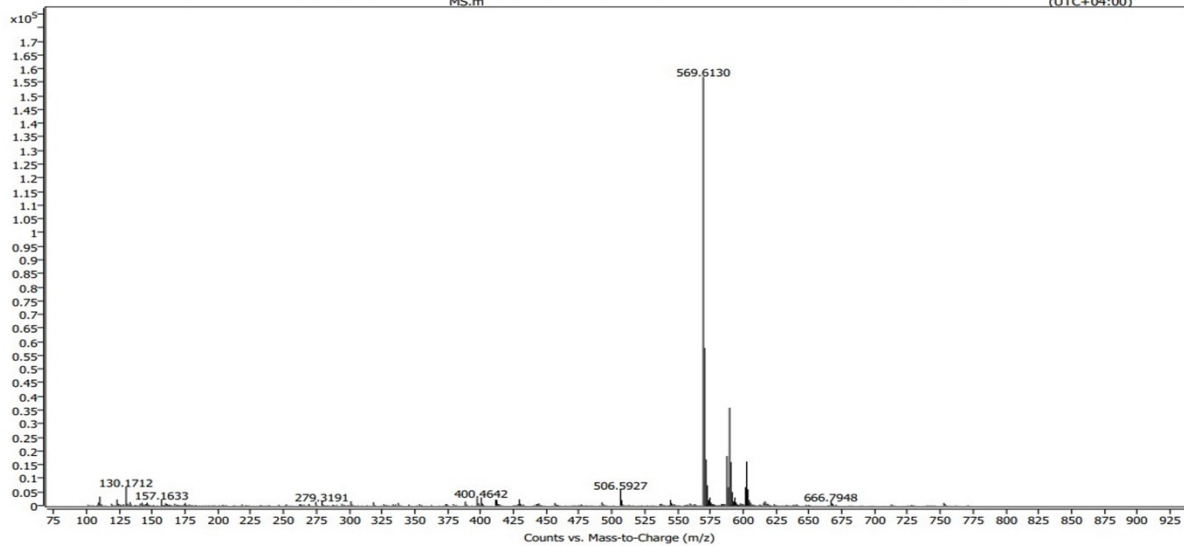

## Figure S34. HRMS Spectrum of 17

# Spectrum Plot Report

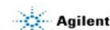

|              |         |                |                        |            |                 |                  |                                  |
|--------------|---------|----------------|------------------------|------------|-----------------|------------------|----------------------------------|
| Sample Name  | TTD-4   | Rack Position  |                        | Instrument | Instrument 1    | Acq Operator     |                                  |
| Inj Vol (ul) | 10      | Plate Position |                        | IRM Status | All ions missed |                  |                                  |
| Data File    | TTD-4.d | Acq Method     | APCI POS ION DMSO MS.m | Comment    |                 | Acq Time (Local) | 03-Nov-24 2:18:30 PM (UTC+04:00) |

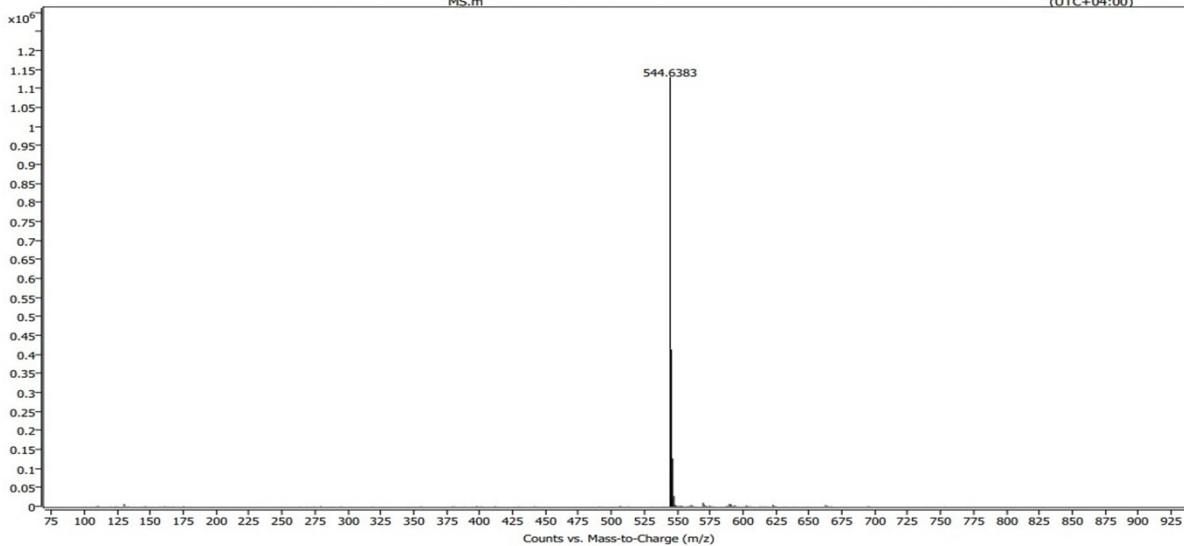

## Figure S35. HRMS Spectrum of 18



# Spectrum Plot Report

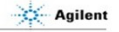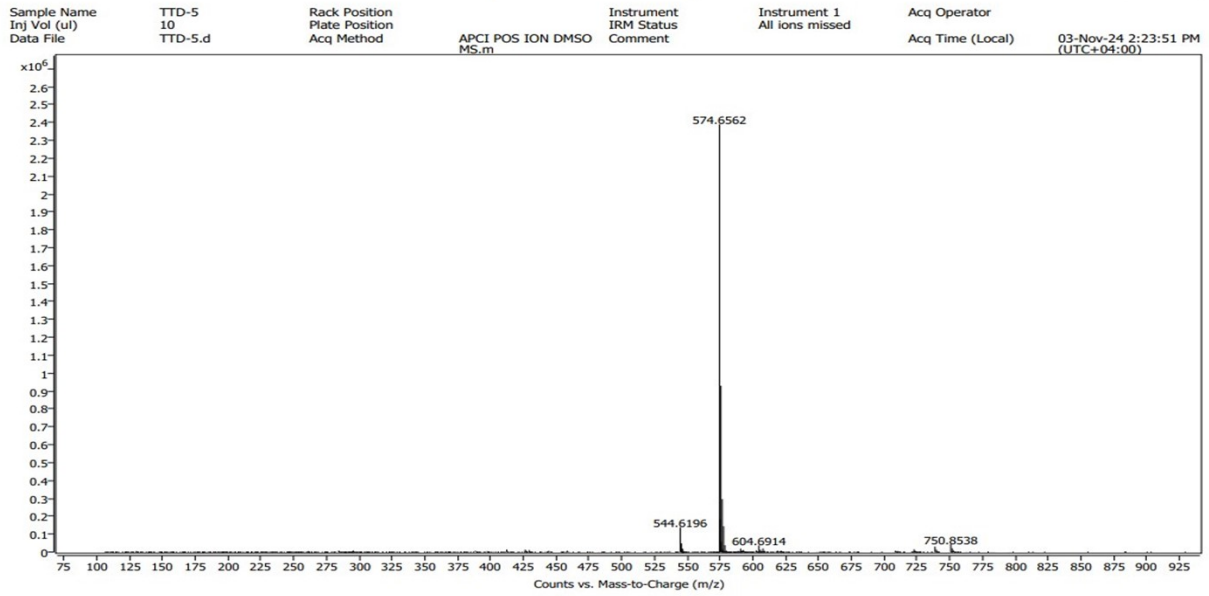

## Figure S36. HRMS Spectrum of 19

# Spectrum Plot Report

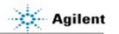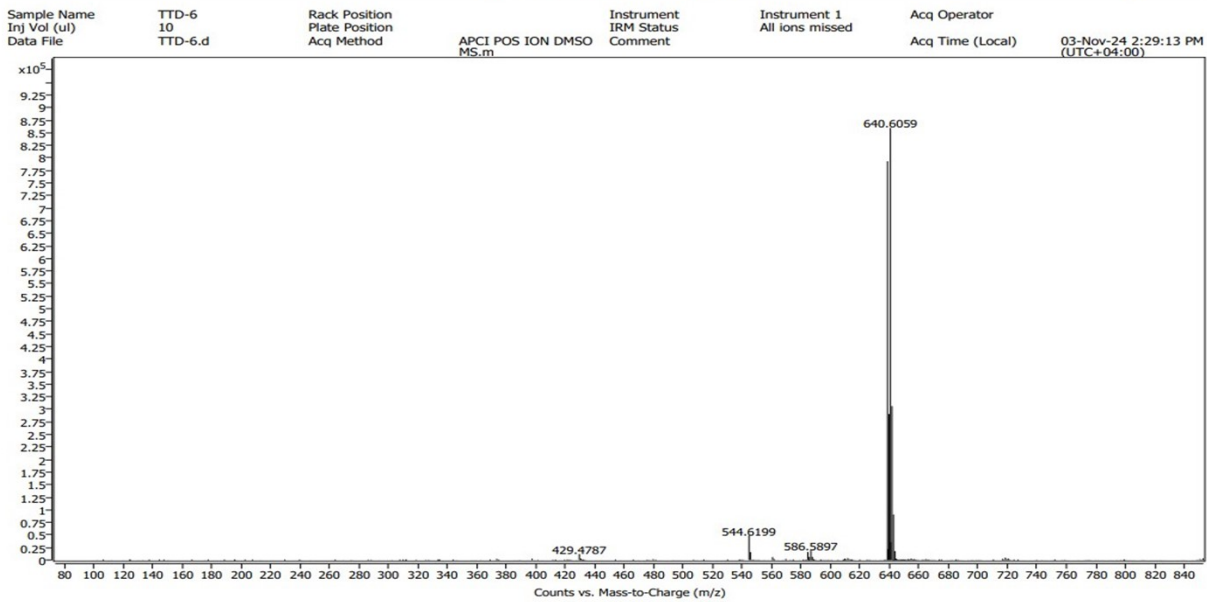

## Figure S37. HRMS Spectrum of 20

# Spectrum Plot Report

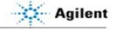

|              |         |                |                        |            |                 |                  |                                  |
|--------------|---------|----------------|------------------------|------------|-----------------|------------------|----------------------------------|
| Sample Name  | TTD-7   | Rack Position  |                        | Instrument | Instrument 1    | Acq Operator     |                                  |
| Inj Vol (ul) | 10      | Plate Position |                        | IRM Status | All ions missed |                  |                                  |
| Data File    | TTD-7.d | Acq Method     | APCI POS ION DMSO MS.m | Comment    |                 | Acq Time (Local) | 03-Nov-24 2:34:36 PM (UTC+04:00) |

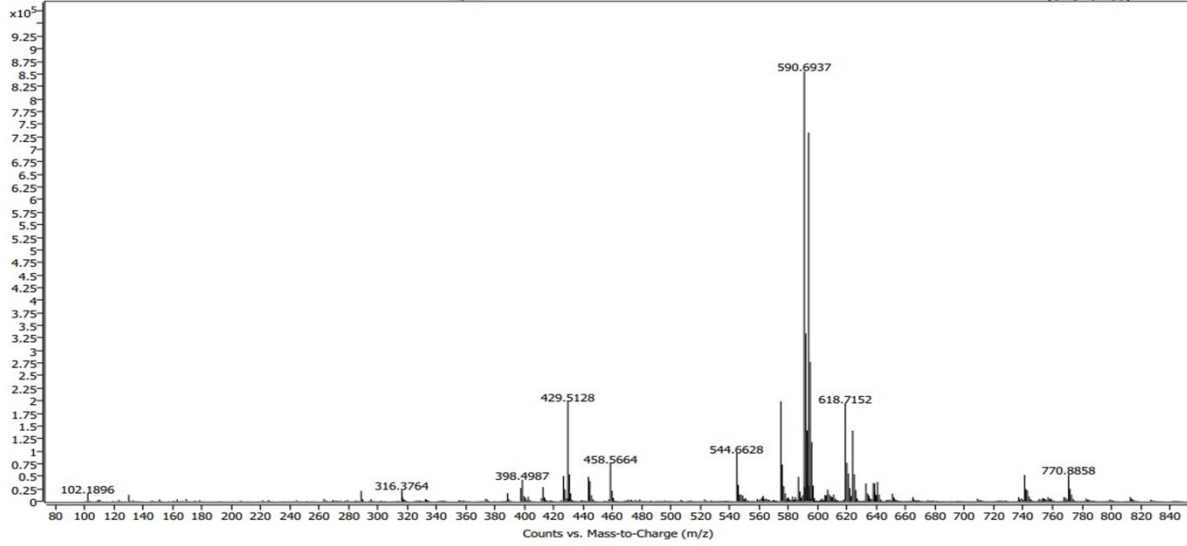

## Figure S38. HRMS Spectrum of 21

# Spectrum Plot Report

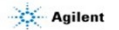

|              |         |                |                        |            |                 |                  |                                  |
|--------------|---------|----------------|------------------------|------------|-----------------|------------------|----------------------------------|
| Sample Name  | TTD-9   | Rack Position  |                        | Instrument | Instrument 1    | Acq Operator     |                                  |
| Inj Vol (ul) | 10      | Plate Position |                        | IRM Status | All ions missed |                  |                                  |
| Data File    | TTD-9.d | Acq Method     | APCI POS ION DMSO MS.m | Comment    |                 | Acq Time (Local) | 03-Nov-24 2:40:25 PM (UTC+04:00) |

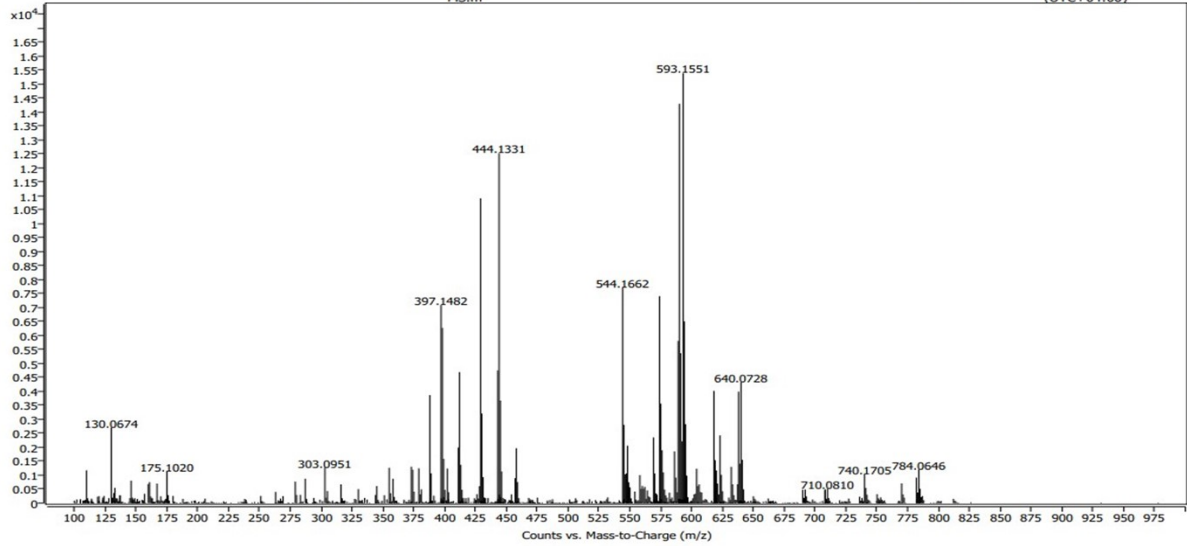

## Figure S39. HRMS Spectrum of 23

# Spectrum Plot Report

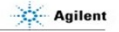

|              |          |                |                           |            |                 |                  |                      |
|--------------|----------|----------------|---------------------------|------------|-----------------|------------------|----------------------|
| Sample Name  | TTD-11   | Rack Position  |                           | Instrument | Instrument 1    | Acq Operator     |                      |
| Inj Vol (ul) | 10       | Plate Position |                           | IRM Status | All ions missed | Acq Time (Local) | 03-Nov-24 2:45:47 PM |
| Data File    | TTD-11.d | Acq Method     | APCI POS ION DMSO<br>MS.m | Comment    |                 |                  | (UTC+04:00)          |

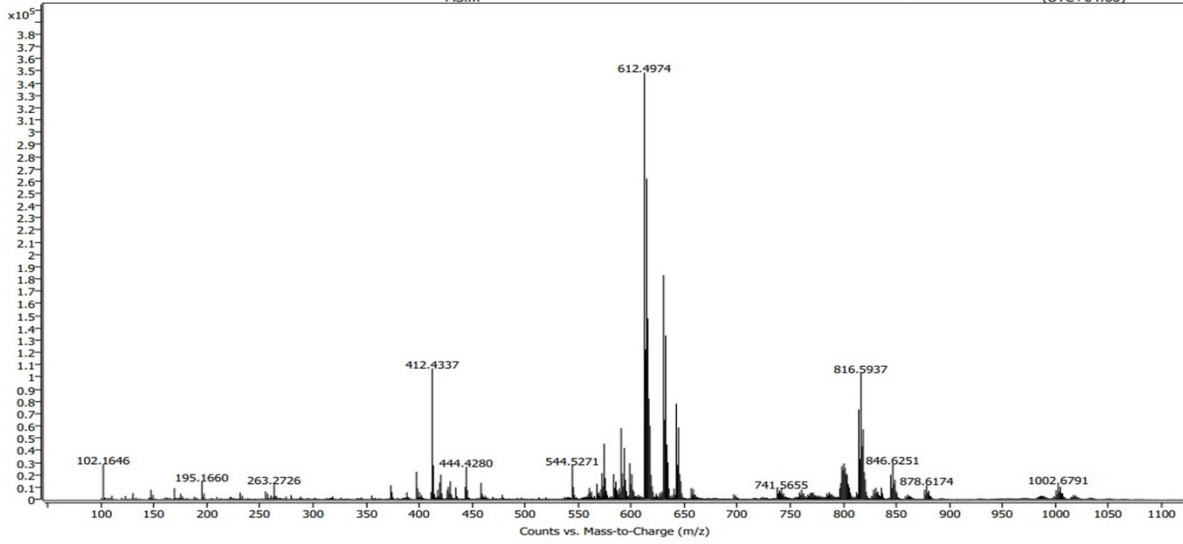

Figure S40. HRMS Spectrum of 25

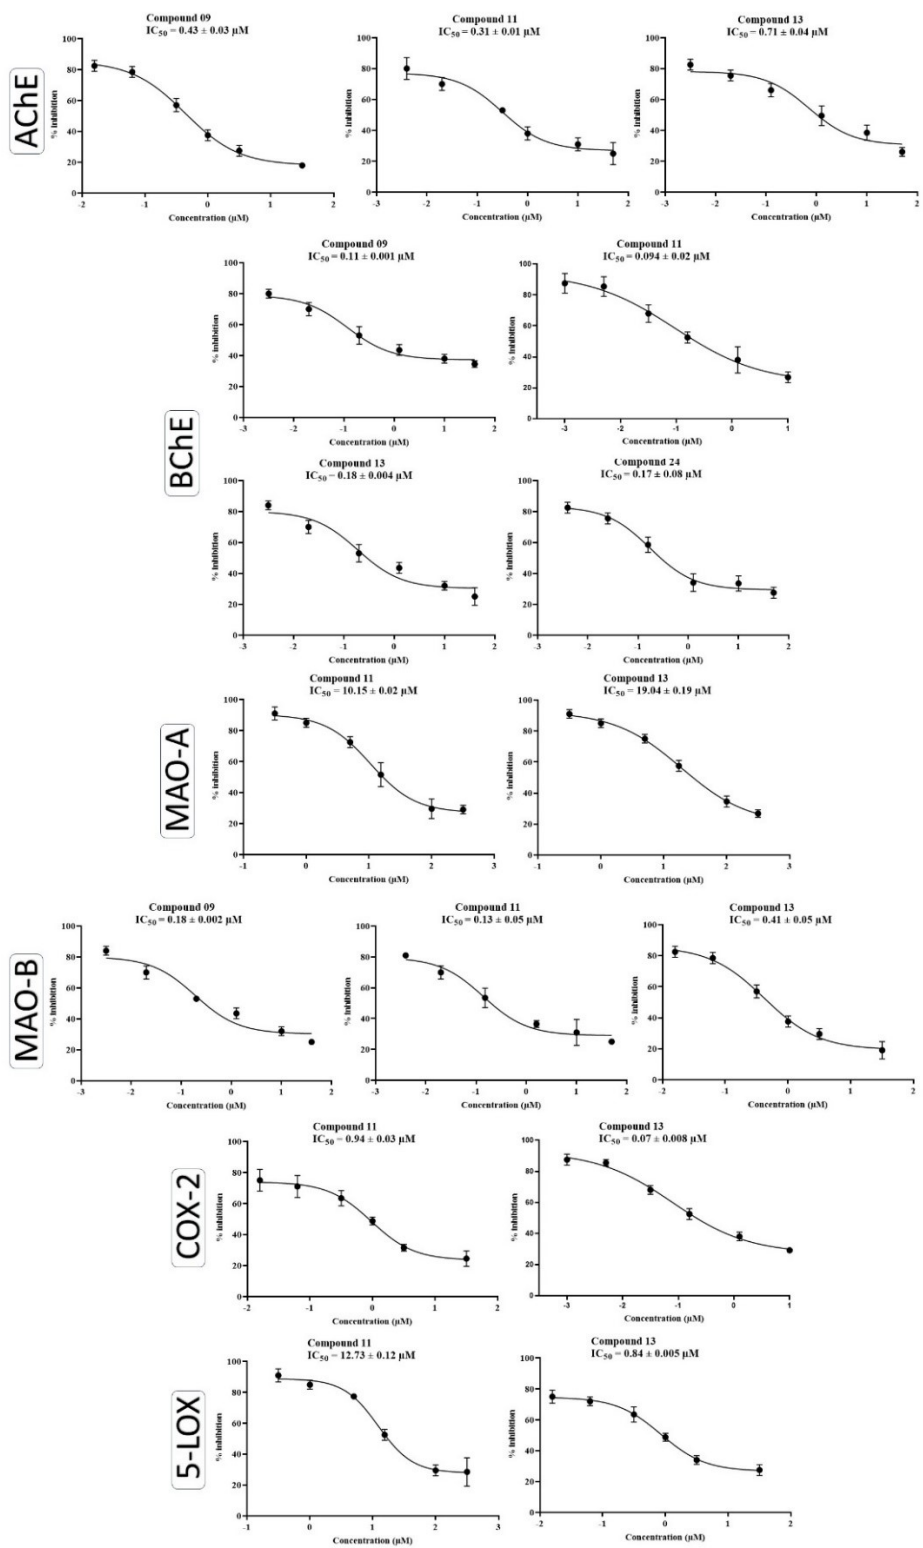

Figure S41: IC<sub>50</sub> Graphs of most potent compounds

## Results and Discussion

### 2.6. ADMET analysis

All compounds demonstrated significant gastrointestinal (GI) absorption, indicating their potential as promising candidates for therapeutic effects. Regarding the dynamics of drug action, many of the compounds exhibited the ability to inhibit crucial enzymes, specifically CYP2C19, CYP2C9, and CYP3A4. The comprehensive physicochemical and kinetic characteristics of these derivatives are outlined in Table S7.

**Table S7.** ADMET characteristics of synthesized hybrid compounds **9-11, 13, 15, 16-25**.

| Molecule                              | <b>9</b> | <b>10</b> | <b>11</b> | <b>13</b> | <b>15</b> | <b>16</b> | <b>17</b> | <b>18</b> | <b>19</b> | <b>20</b> | <b>21</b> | <b>22</b> | <b>23</b> | <b>24</b> | <b>25</b> |
|---------------------------------------|----------|-----------|-----------|-----------|-----------|-----------|-----------|-----------|-----------|-----------|-----------|-----------|-----------|-----------|-----------|
| <b>MW</b>                             | 373.36   | 387.39    | 387.39    | 443.48    | 578.04    | 590.61    | 570.62    | 545.61    | 575.64    | 561.61    | 591.71    | 665.72    | 694.56    | 561.61    | 614.5     |
| <b>Number of Heavy atoms</b>          | 28       | 29        | 29        | 32        | 41        | 43        | 42        | 40        | 42        | 41        | 42        | 49        | 46        | 41        | 42        |
| <b>Number of Aromatic heavy atoms</b> | 23       | 23        | 23        | 28        | 34        | 29        | 29        | 29        | 29        | 29        | 29        | 29        | 23        | 29        | 29        |
| <b>Number of H-bond acceptors</b>     | 6        | 6         | 6         | 5         | 7         | 8         | 7         | 6         | 7         | 7         | 6         | 8         | 8         | 7         | 6         |
| <b>No of H-bond donors</b>            | 3        | 2         | 4         | 4         | 2         | 3         | 3         | 3         | 3         | 4         | 3         | 3         | 3         | 4         | 3         |
| <b>MR</b>                             | 103.24   | 107.56    | 107.17    | 122.83    | 162.67    | 179.89    | 175.78    | 171.06    | 177.56    | 173.09    | 182.78    | 201.82    | 193.34    | 173.09    | 181.08    |
| <b>TPSA</b>                           | 108.47   | 97.47     | 126.29    | 162.89    | 139.54    | 182.28    | 160.25    | 136.46    | 145.69    | 156.69    | 161.76    | 162.76    | 162.76    | 156.69    | 136.46    |
| <b>iLOGP</b>                          | 2.58     | 3.44      | 2.38      | 2.92      | 4.45      | 2.93      | 3.4       | 3.93      | 4.02      | 3.54      | 3.96      | 4.13      | 3.71      | 3.63      | 4.15      |
| <b>XLOGP3</b>                         | 3.8      | 4.13      | 2.81      | 3.24      | 6.56      | 6.19      | 6.08      | 6.36      | 6.33      | 6         | 6.87      | 6.44      | 6.47      | 6         | 7.61      |
| <b>WLOGP</b>                          | 3.71     | 3.8       | 2.62      | 3.66      | 5.9       | 3.4       | 3.36      | 3.49      | 3.5       | 3.2       | 4.21      | 2.19      | 3.76      | 3.2       | 4.8       |
| <b>MLOGP</b>                          | 2.81     | 3.03      | 2.43      | 2.77      | 5.33      | 4.05      | 4.2       | 4.84      | 4.53      | 4.34      | 5.3       | 5.15      | 4.9       | 4.34      | 5.76      |
| <b>GI absorption</b>                  | High     | High      | High      | Low       |
| <b>BBB permeant</b>                   | No       | No        | No        | No        | No        | No        | No        | No        | No        | No        | No        | No        | No        | No        | No        |
| <b>Pgp substrate</b>                  | No       | No        | No        | No        | No        | Yes       | Yes       | Yes       | Yes       | Yes       | No        | Yes       | Yes       | Yes       | No        |
| <b>CYP1A2 inhibitor</b>               | No       | No        | Yes       | No        | No        | No        | Yes       |
| <b>CYP2C19 inhibitor</b>              | No       | No        | No        | No        | No        | Yes       | Yes       | Yes       | Yes       | Yes       | Yes       | No        | No        | Yes       | Yes       |
| <b>CYP2C9 inhibitor</b>               | No       | Yes       | No        | No        | No        | Yes       |
| <b>CYP2D6 inhibitor</b>               | No       | No        | No        | No        | No        | No        | No        | No        | No        | No        | No        | No        | No        | No        | No        |
| <b>CYP3A4 inhibitor</b>               | No       | No        | No        | No        | No        | No        | No        | No        | No        | No        | No        | No        | No        | No        | No        |
| <b>Bioavailability Score</b>          | 0.56     | 0.55      | 0.55      | 0.55      | 0.17      | 0.17      | 0.17      | 0.17      | 0.17      | 0.17      | 0.17      | 0.17      | 0.17      | 0.17      | 0.17      |
| <b>Synthetic Accessibility</b>        | 2.95     | 3.06      | 3.04      | 3.42      | 4.5       | 5.1       | 5.05      | 5         | 5.11      | 5.05      | 5.12      | 6.3       | 6.1       | 5.03      | 5.02      |

Figure S42 presents a radar chart illustrating the ADMET properties of synthesized hybrid compounds **9-11, 13, 15, and 16-25**. Each parameter is represented on an individual axis, with data points interconnected to create a polygon, thereby offering a visual summary of the comprehensive pharmacokinetic profile. The Swiss-Target Prediction tool was utilized to identify potential protein targets, with rankings determined by probability scores, as shown in Figure 12.

A higher score signifies an increased probability of the molecule interacting with the designated protein target. The results were cross-validated with experimental data to establish a conclusive understanding. Experimental data indicate that nearly all synthesized hybrid derivatives may function as potential inhibitors of specific isozymes.

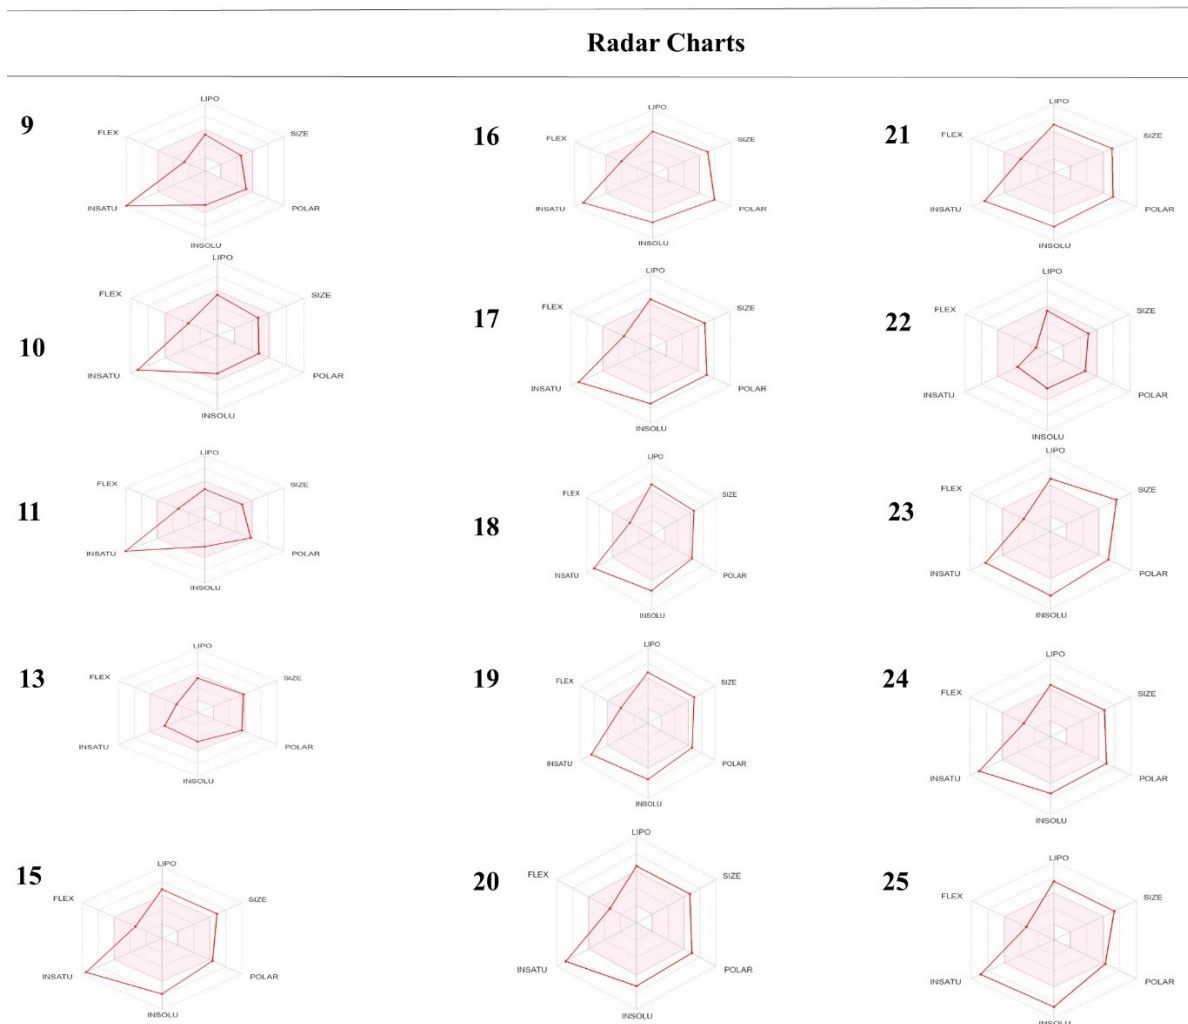

**Figure S43.** Radar charts describing physicochemical and pharmacokinetic properties of synthesized hybrid compounds along with predicted protein targets of compounds **9-11, 13, 15, 16-25**

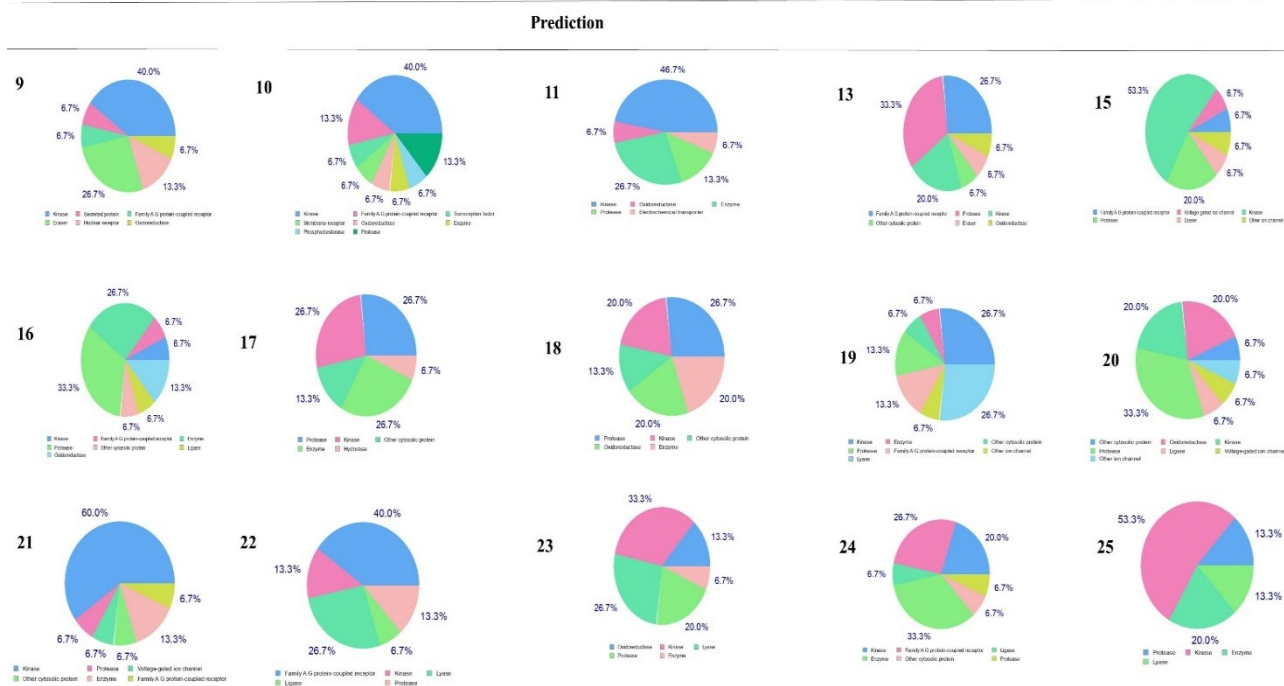

**Figure S44.** Predictions describing physicochemical and pharmacokinetic properties of synthesized hybrid compounds along with predicted protein targets of compounds **9-11, 13, 15, 16-25**

The boiled egg diagram (Figure S33) provides a visual representation that may be used to visualize drug-likeness qualities, especially when it comes to blood-brain barrier (BBB) permeability. None of the substances under investigation could pass across the blood-brain barrier.

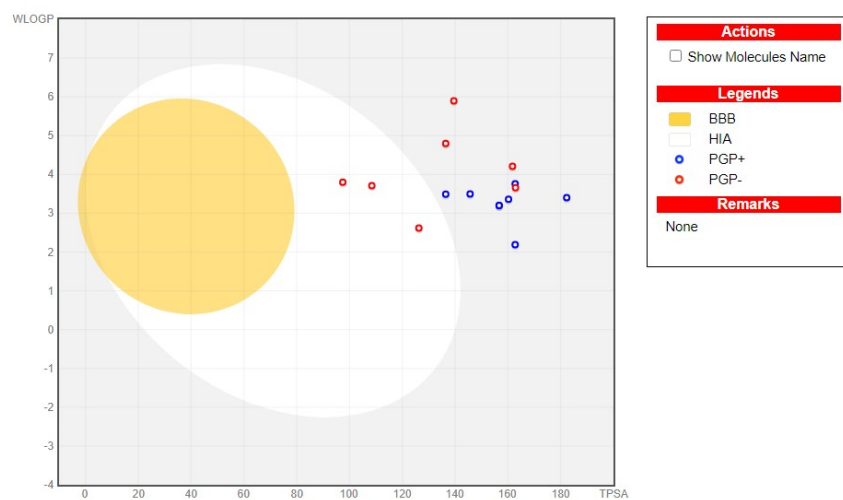

**Figure S45.** Boiled egg diagram for derivatives compounds **9-11, 13, 15, 16-25**
